# Supplementary material
Source: publisher figshare collection journal article supplement (https://gsajournals.figshare.com/ndownloader/files/22079778)
Supplement: Supplementary file 1 [file 22079778]

## Sheet: T5_LL_GO
X1	Category	ID	Term	Genes	adj_pval
1	MF	GO:0016494	C-X-C chemokine receptor activity	gene29763:100195489, gene42905:106581841, gene6708:106600212	0.00019
2	MF	GO:0016493	C-C chemokine receptor activity	gene29763:100195489, gene42905:106581841, gene6708:106600212	0.00036
3	MF	GO:0004740	pyruvate dehydrogenase (acetyl-transferr...	gene14239:106607477, gene7265:106600850	0.00052
4	MF	GO:0070330	aromatase activity	gene23207:100136926, gene48784:100136916	0.00101
5	MF	GO:0016176	superoxide-generating NADPH oxidase acti...	gene13298:106606647, gene8110:106601740	0.00101
6	MF	GO:0042803	protein homodimerization activity	gene10188:106603639, gene13950:106607162, gene14239:106607477, gene16077:106609245, gene18047:106611136, gene2715:106567959, gene28770:106567727, gene32862:100380418, gene37138:106576039, gene37801:106576882, gene42253:106581181, gene42294:106581151, gene43271:106582091, gene43813:106582660, gene4714:106587516, gene5016:106590330, gene6399:106599387, gene7265:106600850, gene7609:106601241	0.0011
7	MF	GO:0004676	3-phosphoinositide-dependent protein kin...	gene14239:106607477, gene7265:106600850	0.00165
8	MF	GO:0005159	insulin-like growth factor receptor bind...	gene20824:106613792, gene26108:106565139, gene26826:106565979	0.00241
9	MF	GO:0030284	estrogen receptor activity	gene19552:106612710, gene41882:106580735	0.00245
10	MF	GO:0005102	receptor binding	gene1291:106607406, gene14239:106607477, gene14257:106607467, gene15093:106608273, gene18767:106611738, gene18791:106611717, gene18957:106611923, gene20633:106613622, gene20824:106613792, gene21390:106560584, gene22776:100136362, gene26108:106565139, gene26325:106565435, gene26826:106565979, gene28033:106566773, gene30786:106569680, gene32862:100380418, gene3430:106574784, gene36296:106575175, ge…	0.00259
11	MF	GO:0005131	growth hormone receptor binding	gene26108:106565139, gene26826:106565979	0.00275
12	MF	GO:0019103	pyrimidine nucleotide binding	gene18767:106611738, gene32862:100380418	0.00339
13	MF	GO:0008519	ammonium transmembrane transporter activ...	gene18047:106611136, gene23086:106562250, gene27580:106566494	0.00386
14	MF	GO:0030165	PDZ domain binding	gene14257:106607467, gene15093:106608273, gene22400:100136366, gene36296:106575175, gene40618:106579507, gene42294:106581151	0.00518
15	MF	GO:0043426	MRF binding	gene10745:106604170, gene19280:106612265	0.00529
16	MF	GO:0030674	protein binding, bridging	gene20824:106613792, gene26108:106565139, gene26209:106565346, gene33543:106572414, gene37138:106576039, gene43271:106582091, gene44582:100196052	0.00537
17	MF	GO:0020037	heme binding	gene23207:100136926, gene37891:106576803, gene48784:100136916, gene5016:106590330	0.00593
18	MF	GO:0015101	organic cation transmembrane transporter...	gene18047:106611136, gene38905:106577803	0.0066
19	MF	GO:0001206	transcriptional repressor activity, RNA ...	gene10188:106603639, gene28770:106567727	0.00707
20	MF	GO:0043014	alpha-tubulin binding	gene18957:106611923, gene38727:106577610, gene6399:106599387	0.00786
21	MF	GO:0001078	transcriptional repressor activity, RNA ...	gene16077:106609245, gene19552:106612710, gene31664:106570526, gene37801:106576882, gene41882:106580735, gene7693:106601356	0.00828
22	MF	GO:0008514	organic anion transmembrane transporter ...	gene22400:100136366, gene27580:106566494, gene38905:106577803, gene41227:106579972, gene50497:106588924	0.0103
23	MF	GO:0032027	myosin light chain binding	gene42905:106581841, gene6708:106600212	0.01076
24	MF	GO:0015216	purine nucleotide transmembrane transpor...	gene41227:106579972, gene50748:106589263	0.01194
25	MF	GO:0048487	beta-tubulin binding	gene29156:106567763, gene6061:106598526, gene6399:106599387	0.01332
26	MF	GO:0005158	insulin receptor binding	gene14239:106607477, gene20824:106613792, gene7265:106600850	0.01332
27	MF	GO:0016004	phospholipase activator activity	gene14239:106607477, gene7265:106600850	0.01381
28	MF	GO:0001077	transcriptional activator activity, RNA ...	gene13950:106607162, gene15093:106608273, gene19552:106612710, gene31664:106570526, gene37801:106576882, gene41882:106580735, gene44237:106583131, gene7609:106601241	0.0139
29	MF	GO:0004683	calmodulin-dependent protein kinase acti...	gene14257:106607467, gene22518:106561677, gene43924:106582757	0.01395
30	MF	GO:0015026	coreceptor activity	gene42905:106581841, gene6708:106600212	0.01446
31	MF	GO:0001228	transcriptional activator activity, RNA ...	gene13950:106607162, gene15093:106608273, gene19552:106612710, gene31664:106570526, gene37801:106576882, gene41882:106580735, gene44237:106583131, gene6530:106599739, gene7609:106601241	0.01455
32	MF	GO:0060229	lipase activator activity	gene14239:106607477, gene7265:106600850	0.01512
33	MF	GO:0005527	macrolide binding	gene26209:106565346, gene44582:100196052	0.01579
34	MF	GO:0005528	FK506 binding	gene26209:106565346, gene44582:100196052	0.01579
35	MF	GO:0001158	enhancer sequence-specific DNA binding	gene10188:106603639, gene19552:106612710, gene28770:106567727, gene31664:106570526, gene41882:106580735	0.01991
36	MF	GO:0042943	D-amino acid transmembrane transporter a...	gene38905:106577803	0.0216
37	MF	GO:0042945	D-serine transmembrane transporter activ...	gene38905:106577803	0.0216
38	MF	GO:0031762	follicle-stimulating hormone receptor bi...	gene22776:100136362	0.0216
39	MF	GO:0010736	serum response element binding	gene37801:106576882	0.0216
40	MF	GO:0015192	L-phenylalanine transmembrane transporte...	gene38905:106577803	0.0216
41	MF	GO:0070379	high mobility group box 1 binding	gene15093:106608273	0.0216
42	MF	GO:0030235	nitric-oxide synthase regulator activity	gene32862:100380418, gene42253:106581181	0.02243
43	MF	GO:0015171	amino acid transmembrane transporter act...	gene27580:106566494, gene38905:106577803, gene50497:106588924	0.02298
44	MF	GO:0008144	drug binding	gene26209:106565346, gene42905:106581841, gene44582:100196052, gene6708:106600212	0.02584
45	MF	GO:0001133	RNA polymerase II transcription factor a...	gene37801:106576882	0.02586
46	MF	GO:0002135	CTP binding	gene32862:100380418	0.02586
47	MF	GO:0030215	semaphorin receptor binding	gene28033:106566773, gene40238:106579272	0.02654
48	MF	GO:0048156	tau protein binding	gene26209:106565346, gene44582:100196052	0.02739
49	MF	GO:0008092	cytoskeletal protein binding	gene18339:106611380, gene18791:106611717, gene18957:106611923, gene23086:106562250, gene24057:106563294, gene26209:106565346, gene26964:106566029, gene29156:106567763, gene30144:106568821, gene33543:106572414, gene38727:106577610, gene41906:106580757, gene42253:106581181, gene42905:106581841, gene43271:106582091, gene44582:100196052, gene6061:106598526, gene6399:106599387, gene6708:106600212	0.02763
50	MF	GO:0042975	peroxisome proliferator activated recept...	gene18957:106611923, gene38727:106577610	0.03002
51	MF	GO:0031798	type 1 metabotropic glutamate receptor b...	gene41882:106580735	0.03011
52	MF	GO:0004382	guanosine-diphosphatase activity	gene17920:106611031	0.03011
53	MF	GO:0015196	L-tryptophan transmembrane transporter a...	gene38905:106577803	0.03011
54	MF	GO:0032767	copper-dependent protein binding	gene44582:100196052	0.03011
55	MF	GO:0042979	ornithine decarboxylase regulator activi...	gene18047:106611136	0.03011
56	MF	GO:0035326	enhancer binding	gene10188:106603639, gene19552:106612710, gene28770:106567727, gene31664:106570526, gene41882:106580735	0.03228
57	MF	GO:0003755	peptidyl-prolyl cis-trans isomerase acti...	gene26209:106565346, gene44582:100196052	0.03367
58	MF	GO:0015658	branched-chain amino acid transmembrane ...	gene38905:106577803	0.03434
59	MF	GO:0019158	mannokinase activity	gene4714:106587516	0.03434
60	MF	GO:0015190	L-leucine transmembrane transporter acti...	gene38905:106577803	0.03434
61	MF	GO:0008865	fructokinase activity	gene4714:106587516	0.03434
62	MF	GO:0032564	dATP binding	gene32862:100380418	0.03434
63	MF	GO:0032558	adenyl deoxyribonucleotide binding	gene32862:100380418	0.03434
64	MF	GO:0071553	G-protein coupled pyrimidinergic nucleot...	gene18767:106611738	0.03434
65	MF	GO:0015065	uridine nucleotide receptor activity	gene18767:106611738	0.03434
66	MF	GO:0015467	G-protein activated inward rectifier pot...	gene3816:106578513	0.03434
67	MF	GO:0000977	RNA polymerase II regulatory region sequ...	gene10188:106603639, gene13950:106607162, gene15093:106608273, gene16077:106609245, gene19552:106612710, gene28770:106567727, gene31664:106570526, gene37801:106576882, gene41882:106580735, gene6530:106599739, gene7609:106601241, gene7693:106601356	0.03594
68	MF	GO:0004340	glucokinase activity	gene4714:106587516	0.03855
69	MF	GO:0042030	ATPase inhibitor activity	gene18991:106611988	0.03855
70	MF	GO:1990050	phosphatidic acid transporter activity	gene27168:106566111	0.03855
71	MF	GO:0017098	sulfonylurea receptor binding	gene32862:100380418	0.03855
72	MF	GO:0016802	trialkylsulfonium hydrolase activity	gene34009:106572868	0.03855
73	MF	GO:0004013	adenosylhomocysteinase activity	gene34009:106572868	0.03855
74	MF	GO:0004396	hexokinase activity	gene4714:106587516	0.03855
75	MF	GO:0000980	RNA polymerase II distal enhancer sequen...	gene10188:106603639, gene19552:106612710, gene28770:106567727, gene41882:106580735	0.03902
76	MF	GO:0016859	cis-trans isomerase activity	gene26209:106565346, gene44582:100196052	0.03946
77	MF	GO:0001012	RNA polymerase II regulatory region DNA ...	gene10188:106603639, gene13950:106607162, gene15093:106608273, gene16077:106609245, gene19552:106612710, gene28770:106567727, gene31664:106570526, gene37801:106576882, gene41882:106580735, gene6530:106599739, gene7609:106601241, gene7693:106601356	0.04021
78	MF	GO:0015215	nucleotide transmembrane transporter act...	gene41227:106579972, gene50748:106589263	0.04046
79	MF	GO:0015173	aromatic amino acid transmembrane transp...	gene38905:106577803	0.04274
80	MF	GO:0032551	pyrimidine ribonucleoside binding	gene32862:100380418	0.04274
81	MF	GO:0032554	purine deoxyribonucleotide binding	gene32862:100380418	0.04274
82	MF	GO:0002134	UTP binding	gene32862:100380418	0.04274
83	MF	GO:0001409	guanine nucleotide transmembrane transpo...	gene50748:106589263	0.04274
84	MF	GO:0035757	chemokine (C-C motif) ligand 19 binding	gene29763:100195489	0.04691
85	MF	GO:0035758	chemokine (C-C motif) ligand 21 binding	gene29763:100195489	0.04691
86	MF	GO:0038121	C-C motif chemokine 21 receptor activity	gene29763:100195489	0.04691
87	MF	GO:0038117	C-C motif chemokine 19 receptor activity	gene29763:100195489	0.04691
88	MF	GO:0019899	enzyme binding	gene13298:106606647, gene13950:106607162, gene13954:106607159, gene14239:106607477, gene14257:106607467, gene18791:106611717, gene18957:106611923, gene20633:106613622, gene20824:106613792, gene22400:100136366, gene24198:106563184, gene26964:106566029, gene29156:106567763, gene30144:106568821, gene31664:106570526, gene32862:100380418, gene33543:106572414, gene37138:106576039, gene37891:106576803, …	0.04722
89	MF	GO:0008509	anion transmembrane transporter activity	gene22400:100136366, gene27580:106566494, gene38905:106577803, gene41227:106579972, gene50497:106588924	0.04789
90	BP	GO:2000184	positive regulation of progesterone bios...	gene18957:106611923, gene38727:106577610	0.00042
91	BP	GO:0007329	positive regulation of transcription fro...	gene18957:106611923, gene38727:106577610	0.00042
92	BP	GO:0036273	response to statin	gene18957:106611923, gene38727:106577610	0.00042
93	BP	GO:0035634	response to stilbenoid	gene18957:106611923, gene38727:106577610	0.00042
94	BP	GO:0048662	negative regulation of smooth muscle cel...	gene18957:106611923, gene38727:106577610, gene41882:106580735, gene5016:106590330	0.00069
95	BP	GO:0048133	male germ-line stem cell asymmetric divi...	gene10188:106603639, gene28770:106567727	0.00071
96	BP	GO:1901860	positive regulation of mitochondrial DNA...	gene18957:106611923, gene38727:106577610	0.00071
97	BP	GO:1901558	response to metformin	gene18957:106611923, gene38727:106577610	0.00071
98	BP	GO:0014741	negative regulation of muscle hypertroph...	gene26325:106565435, gene29156:106567763, gene6061:106598526	0.00079
99	BP	GO:0051552	flavone metabolic process	gene18957:106611923, gene38727:106577610	0.00089
100	BP	GO:0022029	telencephalon cell migration	gene2715:106567959, gene28033:106566773, gene37138:106576039, gene37801:106576882, gene42905:106581841, gene6708:106600212	0.00094
101	BP	GO:0006012	galactose metabolic process	gene18957:106611923, gene38727:106577610, gene6399:106599387	0.00104
102	BP	GO:0070236	negative regulation of activation-induce...	gene10745:106604170, gene19280:106612265	0.00109
103	BP	GO:0008037	cell recognition	gene26964:106566029, gene28033:106566773, gene29763:100195489, gene42253:106581181, gene42294:106581151, gene42905:106581841, gene6399:106599387, gene6708:106600212	0.00116
104	BP	GO:0048642	negative regulation of skeletal muscle t...	gene10745:106604170, gene19280:106612265, gene26325:106565435	0.00126
105	BP	GO:0001831	trophectodermal cellular morphogenesis	gene19552:106612710, gene41882:106580735	0.0013
106	BP	GO:0006885	regulation of pH	gene14239:106607477, gene22400:100136366, gene23086:106562250, gene24198:106563184, gene7265:106600850	0.00131
107	BP	GO:0043619	regulation of transcription from RNA pol...	gene13950:106607162, gene5016:106590330, gene7609:106601241	0.00151
108	BP	GO:0071250	cellular response to nitrite	gene18957:106611923, gene38727:106577610	0.00153
109	BP	GO:0032354	response to follicle-stimulating hormone	gene18957:106611923, gene37891:106576803, gene38727:106577610	0.0016
110	BP	GO:0002064	epithelial cell development	gene14239:106607477, gene14257:106607467, gene1493:106609599, gene15093:106608273, gene18791:106611717, gene2715:106567959, gene41882:106580735, gene42905:106581841, gene43271:106582091, gene6399:106599387, gene6708:106600212, gene7265:106600850	0.0018
111	BP	GO:0046320	regulation of fatty acid oxidation	gene14239:106607477, gene18957:106611923, gene38727:106577610, gene7265:106600850	0.00211
112	BP	GO:0071398	cellular response to fatty acid	gene14239:106607477, gene18767:106611738, gene18957:106611923, gene38727:106577610, gene7265:106600850	0.00218
113	BP	GO:0021627	olfactory nerve morphogenesis	gene18791:106611717, gene2715:106567959	0.00233
114	BP	GO:0001569	patterning of blood vessels	gene15093:106608273, gene28033:106566773, gene37801:106576882, gene42905:106581841, gene6708:106600212	0.00237
115	BP	GO:0007204	positive regulation of cytosolic calcium...	gene14239:106607477, gene18339:106611380, gene18767:106611738, gene18791:106611717, gene29763:100195489, gene41882:106580735, gene42905:106581841, gene6708:106600212, gene7265:106600850	0.00238
116	BP	GO:0035357	peroxisome proliferator activated recept...	gene14239:106607477, gene19306:106612291, gene7265:106600850	0.00243
117	BP	GO:0043500	muscle adaptation	gene18957:106611923, gene26325:106565435, gene29156:106567763, gene38727:106577610, gene44237:106583131, gene5016:106590330, gene51222:100195417, gene6061:106598526	0.00252
118	BP	GO:0097067	cellular response to thyroid hormone sti...	gene18957:106611923, gene38727:106577610, gene43271:106582091	0.00255
119	BP	GO:0071371	cellular response to gonadotropin stimul...	gene18957:106611923, gene37891:106576803, gene38727:106577610	0.00255
120	BP	GO:0042750	hibernation	gene14239:106607477, gene7265:106600850	0.00264
121	BP	GO:0097411	hypoxia-inducible factor-1alpha signalin...	gene14239:106607477, gene7265:106600850	0.00264
122	BP	GO:0071332	cellular response to fructose stimulus	gene18957:106611923, gene38727:106577610	0.00264
123	BP	GO:0051138	positive regulation of NK T cell differe...	gene10188:106603639, gene28770:106567727	0.00264
124	BP	GO:2000377	regulation of reactive oxygen species me...	gene14239:106607477, gene14257:106607467, gene32862:100380418, gene37891:106576803, gene42253:106581181, gene4714:106587516, gene51222:100195417, gene7265:106600850	0.00267
125	BP	GO:0002407	dendritic cell chemotaxis	gene29763:100195489, gene42905:106581841, gene6708:106600212	0.0028
126	BP	GO:0043627	response to estrogen	gene18957:106611923, gene26108:106565139, gene26325:106565435, gene26826:106565979, gene30144:106568821, gene32862:100380418, gene37891:106576803, gene38727:106577610, gene41882:106580735, gene5016:106590330	0.00293
127	BP	GO:0001834	trophectodermal cell proliferation	gene19552:106612710, gene41882:106580735	0.00296
128	BP	GO:0043201	response to leucine	gene18957:106611923, gene38727:106577610	0.00296
129	BP	GO:2000507	positive regulation of energy homeostasi...	gene18957:106611923, gene38727:106577610	0.00296
130	BP	GO:0035912	dorsal aorta morphogenesis	gene15093:106608273, gene37801:106576882	0.00296
131	BP	GO:0000422	mitophagy	gene14239:106607477, gene18817:106611698, gene18957:106611923, gene26325:106565435, gene36296:106575175, gene38727:106577610, gene43813:106582660, gene7265:106600850	0.003
132	BP	GO:0048771	tissue remodeling	gene13950:106607162, gene14239:106607477, gene15093:106608273, gene18339:106611380, gene38727:106577610, gene6399:106599387, gene7265:106600850, gene7609:106601241	0.00317
133	BP	GO:0010510	regulation of acetyl-CoA biosynthetic pr...	gene14239:106607477, gene7265:106600850	0.0033
134	BP	GO:0002021	response to dietary excess	gene18957:106611923, gene38727:106577610, gene41227:106579972	0.00335
135	BP	GO:0090280	positive regulation of calcium ion impor...	gene14239:106607477, gene14257:106607467, gene18339:106611380, gene7265:106600850	0.0036
136	BP	GO:0014878	response to electrical stimulus involved...	gene18957:106611923, gene38727:106577610	0.00365
137	BP	GO:0030334	regulation of cell migration	gene1291:106607406, gene14239:106607477, gene15093:106608273, gene18767:106611738, gene18957:106611923, gene22518:106561677, gene28033:106566773, gene29763:100195489, gene33543:106572414, gene37138:106576039, gene37891:106576803, gene38727:106577610, gene40238:106579272, gene41906:106580757, gene42905:106581841, gene43271:106582091, gene43924:106582757, gene5016:106590330, gene6530:106599739, gen…	0.00397
138	BP	GO:0021511	spinal cord patterning	gene15093:106608273, gene26325:106565435, gene26964:106566029	0.00411
139	BP	GO:0051591	response to cAMP	gene14257:106607467, gene22400:100136366, gene29156:106567763, gene30144:106568821, gene37891:106576803, gene38727:106577610	0.00434
140	BP	GO:0007475	apposition of dorsal and ventral imagina...	gene15093:106608273, gene37801:106576882	0.00441
141	BP	GO:1901857	positive regulation of cellular respirat...	gene18957:106611923, gene38727:106577610	0.00441
142	BP	GO:0055072	iron ion homeostasis	gene13950:106607162, gene21390:106560584, gene24198:106563184, gene5016:106590330, gene7609:106601241	0.00466
143	BP	GO:2001171	positive regulation of ATP biosynthetic ...	gene18957:106611923, gene38727:106577610	0.00482
144	BP	GO:0007595	lactation	gene14257:106607467, gene26108:106565139, gene26826:106565979, gene4714:106587516	0.00519
145	BP	GO:0048371	lateral mesodermal cell differentiation	gene2715:106567959, gene6530:106599739	0.00524
146	BP	GO:0045445	myoblast differentiation	gene13950:106607162, gene18339:106611380, gene26325:106565435, gene37801:106576882, gene7609:106601241	0.00544
147	BP	GO:0014850	response to muscle activity	gene18957:106611923, gene26325:106565435, gene38727:106577610	0.00574
148	BP	GO:0000302	response to reactive oxygen species	gene14239:106607477, gene18957:106611923, gene18991:106611988, gene20824:106613792, gene30144:106568821, gene37891:106576803, gene38727:106577610, gene5016:106590330, gene7265:106600850	0.00576
149	BP	GO:0051147	regulation of muscle cell differentiatio...	gene18339:106611380, gene22518:106561677, gene26325:106565435, gene2715:106567959, gene31618:106570483, gene37801:106576882, gene43924:106582757, gene6530:106599739	0.00588
150	BP	GO:0043305	negative regulation of mast cell degranu...	gene5016:106590330, gene6530:106599739	0.00613
151	BP	GO:0071313	cellular response to caffeine	gene18957:106611923, gene38727:106577610	0.00613
152	BP	GO:0090023	positive regulation of neutrophil chemot...	gene22518:106561677, gene29763:100195489, gene43924:106582757	0.00615
153	BP	GO:0060749	mammary gland alveolus development	gene26108:106565139, gene26826:106565979, gene6530:106599739	0.00615
154	BP	GO:0019722	calcium-mediated signaling	gene13954:106607159, gene14239:106607477, gene18791:106611717, gene22518:106561677, gene42905:106581841, gene6708:106600212, gene7265:106600850	0.00649
155	BP	GO:0050767	regulation of neurogenesis	gene10188:106603639, gene15093:106608273, gene18767:106611738, gene18791:106611717, gene22518:106561677, gene26108:106565139, gene26209:106565346, gene26325:106565435, gene26826:106565979, gene2715:106567959, gene28033:106566773, gene28770:106567727, gene30144:106568821, gene31664:106570526, gene37138:106576039, gene37801:106576882, gene40238:106579272, gene42905:106581841, gene43924:106582757, g…	0.00656
156	BP	GO:0015711	organic anion transport	gene18767:106611738, gene18791:106611717, gene19306:106612291, gene22400:100136366, gene27168:106566111, gene27580:106566494, gene31862:106570727, gene38905:106577803, gene41227:106579972, gene50497:106588924	0.00659
157	BP	GO:0071873	response to norepinephrine	gene18957:106611923, gene38727:106577610	0.00661
158	BP	GO:0061548	ganglion development	gene26964:106566029, gene28033:106566773, gene37891:106576803	0.00701
159	BP	GO:0044458	motile cilium assembly	gene18791:106611717, gene42253:106581181	0.00709
160	BP	GO:0010359	regulation of anion channel activity	gene22400:100136366, gene4714:106587516	0.00709
161	BP	GO:0055085	transmembrane transport	gene10745:106604170, gene14239:106607477, gene14257:106607467, gene18047:106611136, gene18339:106611380, gene18791:106611717, gene18957:106611923, gene19280:106612265, gene22400:100136366, gene23086:106562250, gene24198:106563184, gene27580:106566494, gene31862:106570727, gene32862:100380418, gene34009:106572868, gene3816:106578513, gene38727:106577610, gene38905:106577803, gene39880:106578786, g…	0.00788
162	BP	GO:0046716	muscle cell cellular homeostasis	gene18791:106611717, gene26325:106565435, gene37801:106576882	0.00819
163	BP	GO:0021772	olfactory bulb development	gene2715:106567959, gene28033:106566773, gene31664:106570526, gene37801:106576882	0.00827
164	BP	GO:0071415	cellular response to purine-containing c...	gene18767:106611738, gene18957:106611923, gene38727:106577610	0.00887
165	BP	GO:1903522	regulation of blood circulation	gene13950:106607162, gene18767:106611738, gene18791:106611717, gene20824:106613792, gene28033:106566773, gene32862:100380418, gene5016:106590330, gene51222:100195417, gene6061:106598526, gene7609:106601241	0.00907
166	BP	GO:0048661	positive regulation of smooth muscle cel...	gene18957:106611923, gene20824:106613792, gene2715:106567959, gene38727:106577610, gene5016:106590330	0.00908
167	BP	GO:0035865	cellular response to potassium ion	gene18957:106611923, gene38727:106577610	0.0092
168	BP	GO:0070098	chemokine-mediated signaling pathway	gene29763:100195489, gene42905:106581841, gene6708:106600212	0.00921
169	BP	GO:0001894	tissue homeostasis	gene13950:106607162, gene14239:106607477, gene21390:106560584, gene26964:106566029, gene37801:106576882, gene38727:106577610, gene7265:106600850, gene7609:106601241	0.00941
170	BP	GO:0051281	positive regulation of release of seques...	gene14239:106607477, gene18339:106611380, gene7265:106600850	0.01031
171	BP	GO:0051835	positive regulation of synapse structura...	gene22518:106561677, gene43924:106582757	0.01034
172	BP	GO:0051150	regulation of smooth muscle cell differe...	gene2715:106567959, gene37801:106576882, gene6530:106599739	0.01059
173	BP	GO:0071877	regulation of adrenergic receptor signal...	gene20633:106613622, gene6061:106598526	0.01094
174	BP	GO:0043589	skin morphogenesis	gene2715:106567959, gene37801:106576882	0.01094
175	BP	GO:0001947	heart looping	gene1493:106609599, gene15093:106608273, gene31618:106570483, gene37801:106576882	0.01135
176	BP	GO:0034103	regulation of tissue remodeling	gene14239:106607477, gene38727:106577610, gene6399:106599387, gene7265:106600850	0.01155
177	BP	GO:0006811	ion transport	gene10745:106604170, gene14239:106607477, gene14257:106607467, gene18047:106611136, gene18339:106611380, gene18767:106611738, gene18791:106611717, gene18957:106611923, gene19280:106612265, gene19306:106612291, gene21390:106560584, gene22400:100136366, gene23086:106562250, gene24198:106563184, gene27168:106566111, gene27580:106566494, gene31862:106570727, gene34009:106572868, gene3816:106578513, g…	0.01181
178	BP	GO:0070633	transepithelial transport	gene18767:106611738, gene23086:106562250	0.01217
179	BP	GO:0001764	neuron migration	gene2715:106567959, gene28033:106566773, gene32862:100380418, gene37138:106576039, gene37801:106576882, gene42905:106581841, gene6708:106600212	0.01221
180	BP	GO:0032388	positive regulation of intracellular tra...	gene14239:106607477, gene14257:106607467, gene18339:106611380, gene18817:106611698, gene22518:106561677, gene27168:106566111, gene32862:100380418, gene42253:106581181, gene43271:106582091, gene43924:106582757, gene7265:106600850	0.01247
181	BP	GO:0048625	myoblast fate commitment	gene13950:106607162, gene7609:106601241	0.01281
182	BP	GO:0099515	actin filament-based transport	gene41046:106580130, gene41906:106580757	0.01281
183	BP	GO:0010517	regulation of phospholipase activity	gene14239:106607477, gene2715:106567959, gene41882:106580735, gene6061:106598526, gene7265:106600850	0.01294
184	BP	GO:0046939	nucleotide phosphorylation	gene14257:106607467, gene17920:106611031, gene18957:106611923, gene38727:106577610, gene4714:106587516	0.01294
185	BP	GO:0010039	response to iron ion	gene21390:106560584, gene37891:106576803, gene5016:106590330	0.01303
186	BP	GO:1903651	positive regulation of cytoplasmic trans...	gene14239:106607477, gene18339:106611380, gene18817:106611698, gene22518:106561677, gene27168:106566111, gene32862:100380418, gene43271:106582091, gene43924:106582757, gene7265:106600850	0.01313
187	BP	GO:0051647	nucleus localization	gene18791:106611717, gene33460:106572020, gene41906:106580757, gene42253:106581181	0.01346
188	BP	GO:0009409	response to cold	gene18957:106611923, gene32862:100380418, gene38727:106577610, gene44237:106583131	0.01346
189	BP	GO:0010614	negative regulation of cardiac muscle hy...	gene29156:106567763, gene6061:106598526	0.01346
190	BP	GO:0060856	establishment of blood-brain barrier	gene18791:106611717, gene31862:106570727	0.01346
191	BP	GO:0009266	response to temperature stimulus	gene18957:106611923, gene18991:106611988, gene26209:106565346, gene26325:106565435, gene32862:100380418, gene38727:106577610, gene44237:106583131, gene44582:100196052, gene5016:106590330	0.01361
192	BP	GO:0006094	gluconeogenesis	gene14239:106607477, gene18957:106611923, gene38727:106577610, gene50497:106588924, gene7265:106600850	0.01379
193	BP	GO:0061383	trabecula morphogenesis	gene15093:106608273, gene37801:106576882, gene38727:106577610, gene40238:106579272	0.01413
194	BP	GO:0001892	embryonic placenta development	gene13950:106607162, gene19552:106612710, gene2715:106567959, gene41882:106580735, gene47359:106586132, gene7609:106601241	0.0144
195	BP	GO:0031016	pancreas development	gene14239:106607477, gene15093:106608273, gene26325:106565435, gene6530:106599739, gene7265:106600850	0.01468
196	BP	GO:0006970	response to osmotic stress	gene10745:106604170, gene14239:106607477, gene18339:106611380, gene19280:106612265, gene32862:100380418, gene7265:106600850	0.01469
197	BP	GO:0015695	organic cation transport	gene18047:106611136, gene38905:106577803	0.01481
198	BP	GO:0048640	negative regulation of developmental gro...	gene26108:106565139, gene26325:106565435, gene26826:106565979, gene28033:106566773, gene40238:106579272	0.01523
199	BP	GO:0002931	response to ischemia	gene18957:106611923, gene38727:106577610, gene4714:106587516	0.0154
200	BP	GO:0040015	negative regulation of multicellular org...	gene26108:106565139, gene26826:106565979	0.01551
201	BP	GO:0060433	bronchus development	gene26964:106566029, gene37801:106576882	0.01551
202	BP	GO:0071372	cellular response to follicle-stimulatin...	gene18957:106611923, gene38727:106577610	0.01551
203	BP	GO:0071281	cellular response to iron ion	gene21390:106560584, gene5016:106590330	0.01551
204	BP	GO:0048702	embryonic neurocranium morphogenesis	gene26964:106566029, gene31618:106570483	0.01551
205	BP	GO:0002066	columnar/cuboidal epithelial cell develo...	gene14239:106607477, gene14257:106607467, gene1493:106609599, gene15093:106608273, gene2715:106567959, gene7265:106600850	0.01561
206	BP	GO:0001678	cellular glucose homeostasis	gene14239:106607477, gene18957:106611923, gene22400:100136366, gene38727:106577610, gene4714:106587516, gene7265:106600850	0.01593
207	BP	GO:0006110	regulation of glycolytic process	gene17920:106611031, gene18957:106611923, gene38727:106577610	0.01612
208	BP	GO:0098780	response to mitochondrial depolarisation	gene14239:106607477, gene26325:106565435, gene36296:106575175, gene43813:106582660, gene7265:106600850	0.01618
209	BP	GO:0098779	mitophagy in response to mitochondrial d...	gene14239:106607477, gene26325:106565435, gene36296:106575175, gene43813:106582660, gene7265:106600850	0.01618
210	BP	GO:0001501	skeletal system development	gene10188:106603639, gene13298:106606647, gene19552:106612710, gene26325:106565435, gene26964:106566029, gene2715:106567959, gene28770:106567727, gene31618:106570483, gene37801:106576882, gene38727:106577610, gene40238:106579272, gene41882:106580735, gene42294:106581151, gene8110:106601740	0.01618
211	BP	GO:0060047	heart contraction	gene13950:106607162, gene18791:106611717, gene28033:106566773, gene32862:100380418, gene37165:106576058, gene42905:106581841, gene6061:106598526, gene6708:106600212, gene7609:106601241	0.0162
212	BP	GO:0030099	myeloid cell differentiation	gene10188:106603639, gene13950:106607162, gene15093:106608273, gene19552:106612710, gene2707:106568012, gene28770:106567727, gene29763:100195489, gene37801:106576882, gene38727:106577610, gene41882:106580735, gene7609:106601241, gene7693:106601356	0.01622
213	BP	GO:0060463	lung lobe morphogenesis	gene2715:106567959, gene6530:106599739	0.01622
214	BP	GO:0015868	purine ribonucleotide transport	gene41227:106579972, gene50748:106589263	0.01622
215	BP	GO:0019319	hexose biosynthetic process	gene14239:106607477, gene18957:106611923, gene38727:106577610, gene50497:106588924, gene7265:106600850	0.01637
216	BP	GO:0045124	regulation of bone resorption	gene14239:106607477, gene38727:106577610, gene7265:106600850	0.01649
217	BP	GO:0030336	negative regulation of cell migration	gene1291:106607406, gene15093:106608273, gene18957:106611923, gene28033:106566773, gene37138:106576039, gene37891:106576803, gene38727:106577610, gene5016:106590330	0.01668
218	BP	GO:0000423	macromitophagy	gene14239:106607477, gene26325:106565435, gene36296:106575175, gene43813:106582660, gene7265:106600850	0.01677
219	BP	GO:0048745	smooth muscle tissue development	gene16077:106609245, gene37801:106576882, gene6530:106599739	0.01686
220	BP	GO:0003015	heart process	gene13950:106607162, gene18791:106611717, gene28033:106566773, gene32862:100380418, gene37165:106576058, gene42905:106581841, gene6061:106598526, gene6708:106600212, gene7609:106601241	0.01687
221	BP	GO:0060501	positive regulation of epithelial cell p...	gene16077:106609245, gene2715:106567959	0.01694
222	BP	GO:0001666	response to hypoxia	gene13950:106607162, gene14239:106607477, gene18957:106611923, gene20824:106613792, gene37801:106576882, gene37891:106576803, gene38727:106577610, gene42905:106581841, gene5016:106590330, gene6708:106600212, gene7265:106600850, gene7609:106601241	0.01709
223	BP	GO:0000266	mitochondrial fission	gene18957:106611923, gene38727:106577610, gene40641:106579534	0.01724
224	BP	GO:0043065	positive regulation of apoptotic process	gene10188:106603639, gene10745:106604170, gene13602:106606840, gene18957:106611923, gene19280:106612265, gene22518:106561677, gene24824:106563956, gene2707:106568012, gene28770:106567727, gene37138:106576039, gene37891:106576803, gene38727:106577610, gene42253:106581181, gene43924:106582757, gene44669:106583478, gene6399:106599387	0.01739
225	BP	GO:0040013	negative regulation of locomotion	gene1291:106607406, gene15093:106608273, gene18957:106611923, gene20633:106613622, gene28033:106566773, gene37138:106576039, gene37891:106576803, gene38727:106577610, gene5016:106590330	0.01756
226	BP	GO:1903146	regulation of mitophagy	gene14239:106607477, gene18817:106611698, gene26325:106565435, gene7265:106600850	0.01759
227	BP	GO:0060462	lung lobe development	gene2715:106567959, gene6530:106599739	0.01768
228	BP	GO:1903829	positive regulation of cellular protein ...	gene14239:106607477, gene18817:106611698, gene22518:106561677, gene27168:106566111, gene32862:100380418, gene33543:106572414, gene42253:106581181, gene43271:106582091, gene43924:106582757, gene7265:106600850	0.01778
229	BP	GO:0061448	connective tissue development	gene10188:106603639, gene19552:106612710, gene20633:106613622, gene2715:106567959, gene28770:106567727, gene31664:106570526, gene37801:106576882, gene41227:106579972, gene41882:106580735	0.01792
230	BP	GO:0061371	determination of heart left/right asymme...	gene1493:106609599, gene15093:106608273, gene31618:106570483, gene37801:106576882	0.01839
231	BP	GO:0015865	purine nucleotide transport	gene41227:106579972, gene50748:106589263	0.01843
232	BP	GO:0042060	wound healing	gene1291:106607406, gene14239:106607477, gene14257:106607467, gene18339:106611380, gene18767:106611738, gene20824:106613792, gene21390:106560584, gene26325:106565435, gene2715:106567959, gene29156:106567763, gene37801:106576882, gene38905:106577803, gene5016:106590330, gene50497:106588924, gene6399:106599387, gene7265:106600850	0.01853
233	BP	GO:0050769	positive regulation of neurogenesis	gene18767:106611738, gene18791:106611717, gene22518:106561677, gene26108:106565139, gene26826:106565979, gene2715:106567959, gene28033:106566773, gene30144:106568821, gene37801:106576882, gene40238:106579272, gene42905:106581841, gene43924:106582757, gene6708:106600212	0.01871
234	BP	GO:2000146	negative regulation of cell motility	gene1291:106607406, gene15093:106608273, gene18957:106611923, gene28033:106566773, gene37138:106576039, gene37891:106576803, gene38727:106577610, gene5016:106590330	0.01891
235	BP	GO:2000310	regulation of N-methyl-D-aspartate selec...	gene18957:106611923, gene38727:106577610	0.01919
236	BP	GO:0060452	positive regulation of cardiac muscle co...	gene32862:100380418, gene6061:106598526	0.01919
237	BP	GO:0048714	positive regulation of oligodendrocyte d...	gene42905:106581841, gene6708:106600212	0.01919
238	BP	GO:0042415	norepinephrine metabolic process	gene13950:106607162, gene7609:106601241	0.01919
239	BP	GO:0003333	amino acid transmembrane transport	gene27580:106566494, gene38905:106577803, gene50497:106588924	0.01919
240	CC	GO:0016323	basolateral plasma membrane	gene14257:106607467, gene18767:106611738, gene21390:106560584, gene22400:100136366, gene23086:106562250, gene23207:100136926, gene32862:100380418, gene38905:106577803, gene42294:106581151, gene43271:106582091, gene48784:100136916, gene6399:106599387	3.2e-05
241	CC	GO:0005967	mitochondrial pyruvate dehydrogenase com...	gene14239:106607477, gene7265:106600850	0.0012
242	CC	GO:0031528	microvillus membrane	gene23207:100136926, gene43271:106582091, gene48784:100136916	0.0012
243	CC	GO:0043020	NADPH oxidase complex	gene13298:106606647, gene8110:106601740	0.0017
244	CC	GO:0043005	neuron projection	gene14257:106607467, gene18047:106611136, gene18791:106611717, gene18957:106611923, gene22518:106561677, gene24198:106563184, gene26209:106565346, gene26964:106566029, gene27580:106566494, gene28033:106566773, gene30144:106568821, gene32862:100380418, gene34009:106572868, gene37138:106576039, gene3816:106578513, gene38727:106577610, gene38905:106577803, gene40238:106579272, gene41882:106580735, g…	0.0026
245	CC	GO:0009897	external side of plasma membrane	gene1291:106607406, gene21390:106560584, gene29763:100195489, gene3816:106578513, gene42905:106581841, gene6399:106599387, gene6708:106600212	0.0028
246	CC	GO:0016023	cytoplasmic, membrane-bounded vesicle	gene1291:106607406, gene14239:106607477, gene15093:106608273, gene17920:106611031, gene18047:106611136, gene21390:106560584, gene22400:100136366, gene24198:106563184, gene2715:106567959, gene30144:106568821, gene30598:106569487, gene32862:100380418, gene37138:106576039, gene40238:106579272, gene41046:106580130, gene42294:106581151, gene42905:106581841, gene43271:106582091, gene43924:106582757, ge…	0.0029
247	CC	GO:0043186	P granule	gene13954:106607159, gene29156:106567763, gene39031:106577912	0.003
248	CC	GO:0005886	plasma membrane	gene10188:106603639, gene1291:106607406, gene13298:106606647, gene14239:106607477, gene14257:106607467, gene15093:106608273, gene17920:106611031, gene18339:106611380, gene18767:106611738, gene18791:106611717, gene20633:106613622, gene20824:106613792, gene21390:106560584, gene22400:100136366, gene22518:106561677, gene23086:106562250, gene23207:100136926, gene24198:106563184, gene26108:106565139, g…	0.0038
249	CC	GO:0031527	filopodium membrane	gene18791:106611717, gene41906:106580757, gene43271:106582091	0.0045
250	CC	GO:0045202	synapse	gene14239:106607477, gene14257:106607467, gene15093:106608273, gene18791:106611717, gene24198:106563184, gene26964:106566029, gene2715:106567959, gene29156:106567763, gene30144:106568821, gene36296:106575175, gene37138:106576039, gene40238:106579272, gene41882:106580735, gene41906:106580757, gene42294:106581151, gene43813:106582660, gene45275:106584035, gene50748:106589263, gene7265:106600850	0.0052
251	CC	GO:0070161	anchoring junction	gene1291:106607406, gene14239:106607477, gene14257:106607467, gene15093:106608273, gene18339:106611380, gene24198:106563184, gene33543:106572414, gene36296:106575175, gene37138:106576039, gene41906:106580757, gene42294:106581151, gene43271:106582091, gene45275:106584035, gene6399:106599387, gene7265:106600850	0.0073
252	CC	GO:0005912	adherens junction	gene1291:106607406, gene14239:106607477, gene14257:106607467, gene15093:106608273, gene18339:106611380, gene24198:106563184, gene33543:106572414, gene36296:106575175, gene37138:106576039, gene41906:106580757, gene42294:106581151, gene43271:106582091, gene45275:106584035, gene7265:106600850	0.0135
253	CC	GO:0031226	intrinsic component of plasma membrane	gene1291:106607406, gene13298:106606647, gene14257:106607467, gene18767:106611738, gene21390:106560584, gene23086:106562250, gene2715:106567959, gene27580:106566494, gene29763:100195489, gene30144:106568821, gene30598:106569487, gene31862:106570727, gene37267:106576173, gene3816:106578513, gene38905:106577803, gene40238:106579272, gene42294:106581151, gene50497:106588924, gene8110:106601740	0.0142
254	CC	GO:0000178	exosome (RNase complex)	gene13954:106607159, gene14257:106607467	0.0145
255	CC	GO:0044456	synapse part	gene14239:106607477, gene14257:106607467, gene18791:106611717, gene24198:106563184, gene29156:106567763, gene30144:106568821, gene36296:106575175, gene37138:106576039, gene40238:106579272, gene41882:106580735, gene41906:106580757, gene42294:106581151, gene45275:106584035, gene7265:106600850	0.0209
256	CC	GO:0009925	basal plasma membrane	gene21390:106560584, gene23207:100136926, gene48784:100136916	0.0215
257	CC	GO:0044463	cell projection part	gene14239:106607477, gene14257:106607467, gene18791:106611717, gene23207:100136926, gene24198:106563184, gene26209:106565346, gene26964:106566029, gene30144:106568821, gene32862:100380418, gene37138:106576039, gene41882:106580735, gene41906:106580757, gene42253:106581181, gene42294:106581151, gene42905:106581841, gene43271:106582091, gene43813:106582660, gene44582:100196052, gene45275:106584035, …	0.0216
258	CC	GO:0098793	presynapse	gene14257:106607467, gene18791:106611717, gene24198:106563184, gene30144:106568821, gene36296:106575175, gene40238:106579272, gene41882:106580735, gene42294:106581151	0.0238
259	CC	GO:0033267	axon part	gene18791:106611717, gene24198:106563184, gene26209:106565346, gene26964:106566029, gene30144:106568821, gene41882:106580735, gene42294:106581151, gene44582:100196052	0.0294
260	CC	GO:0032809	neuronal cell body membrane	gene3816:106578513, gene42294:106581151	0.0302
261	CC	GO:0044298	cell body membrane	gene3816:106578513, gene42294:106581151	0.0302
262	CC	GO:0031205	endoplasmic reticulum Sec complex	gene22400:100136366	0.0302
263	CC	GO:0031514	motile cilium	gene19306:106612291, gene42253:106581181, gene4714:106587516	0.0316
264	CC	GO:0097440	apical dendrite	gene18957:106611923, gene38727:106577610	0.0348
265	CC	GO:0005887	integral component of plasma membrane	gene13298:106606647, gene14257:106607467, gene18767:106611738, gene21390:106560584, gene23086:106562250, gene2715:106567959, gene27580:106566494, gene29763:100195489, gene30144:106568821, gene31862:106570727, gene37267:106576173, gene3816:106578513, gene38905:106577803, gene40238:106579272, gene42294:106581151, gene50497:106588924, gene8110:106601740	0.0354
266	CC	GO:0046658	anchored component of plasma membrane	gene21390:106560584, gene30598:106569487	0.0358
267	CC	GO:0016607	nuclear speck	gene10188:106603639, gene13950:106607162, gene28770:106567727, gene44237:106583131, gene7609:106601241	0.036
268	CC	GO:0030426	growth cone	gene18791:106611717, gene26209:106565346, gene42905:106581841, gene43813:106582660, gene44582:100196052, gene6708:106600212	0.037
269	CC	GO:0031232	extrinsic component of external side of ...	gene21390:106560584	0.0387
270	CC	GO:0005739	mitochondrion	gene1291:106607406, gene14239:106607477, gene18339:106611380, gene18767:106611738, gene18791:106611717, gene18957:106611923, gene27168:106566111, gene29156:106567763, gene31664:106570526, gene32862:100380418, gene33460:106572020, gene36296:106575175, gene37138:106576039, gene37891:106576803, gene38727:106577610, gene39031:106577912, gene40641:106579534, gene41227:106579972, gene41882:106580735, g…	0.0422
271	CC	GO:0070435	Shc-EGFR complex	gene20824:106613792	0.0429
272	CC	GO:0035003	subapical complex	gene15093:106608273	0.047
273	CC	GO:0035061	interchromatin granule	gene44237:106583131	0.047

## Sheet: T5_SP_GO
X1	Category	ID	Term	Genes	adj_pval
1	MF	GO:0005328	neurotransmitter:sodium symporter activi...	gene12169:106605517, gene27233:106566182, gene27580:106566494, gene33022:106571856, gene3906:106579373, gene44917:100194771, gene45776:106584498	1.8e-05
2	MF	GO:0005332	gamma-aminobutyric acid:sodium symporter...	gene27233:106566182, gene27580:106566494, gene33022:106571856, gene44917:100194771, gene45776:106584498	2.5e-05
3	MF	GO:0001078	transcriptional repressor activity, RNA ...	gene11900:100136378, gene13951:106607161, gene14213:106607496, gene16077:106609245, gene17688:106610738, gene21752:100136415, gene22999:106562092, gene25381:106564532, gene26984:106566008, gene30708:106569597, gene32601:106571544, gene33738:106572630, gene39192:106578083, gene4157:106582110, gene44423:106583303, gene44664:100136532, gene46613:100196040, gene48548:106587185, gene48856:106587624, g…	3.4e-05
4	MF	GO:0030977	taurine binding	gene27233:106566182, gene33022:106571856, gene44917:100194771	0.00025
5	MF	GO:0000977	RNA polymerase II regulatory region sequ...	gene10188:106603639, gene10316:106603784, gene11362:106604712, gene11900:100136378, gene12283:106605616, gene12426:106605776, gene13721:106606950, gene13819:106607038, gene13950:106607162, gene14213:106607496, gene16077:106609245, gene17688:106610738, gene19148:106612139, gene19970:106613028, gene20042:106612968, gene20316:106613297, gene21413:106560604, gene21752:100136415, gene22999:106562092, …	0.00027
6	MF	GO:0015171	amino acid transmembrane transporter act...	gene11330:106604686, gene12169:106605517, gene16405:106609517, gene16406:106609518, gene17103:106610197, gene24289:106563501, gene27233:106566182, gene27580:106566494, gene28327:106567194, gene33022:106571856, gene37490:100306766, gene37492:106576408, gene38905:106577803, gene3906:106579373, gene43895:106582726, gene44917:100194771, gene45776:106584498	0.00027
7	MF	GO:0015175	neutral amino acid transmembrane transpo...	gene11330:106604686, gene12169:106605517, gene24289:106563501, gene27233:106566182, gene33022:106571856, gene38905:106577803, gene3906:106579373, gene44917:100194771	0.00029
8	MF	GO:0001046	core promoter sequence-specific DNA bind...	gene11900:100136378, gene14213:106607496, gene22999:106562092, gene25381:106564532, gene29145:106567770, gene32945:106571833, gene35149:106574039, gene39631:106578540, gene4157:106582110, gene44423:106583303, gene48548:106587185, gene48856:106587624, gene51008:106589488, gene52402:106590982, gene5434:106593991, gene5437:106594023, gene5454:106594195, gene63321:106591221, gene7693:106601356, gene9…	0.00033
9	MF	GO:0055131	C3HC4-type RING finger domain binding	gene19986:106613013, gene27435:106566386, gene34008:106572869, gene42916:106581833, gene7385:106601018	0.00045
10	MF	GO:0001206	transcriptional repressor activity, RNA ...	gene10188:106603639, gene12283:106605616, gene28770:106567727, gene3772:106577891, gene75812:106594198	0.00053
11	MF	GO:0005159	insulin-like growth factor receptor bind...	gene15601:106608778, gene20824:106613792, gene21338:106560529, gene26108:106565139, gene26826:106565979, gene28441:106567289, gene37273:106576177	0.00057
12	MF	GO:0005131	growth hormone receptor binding	gene26108:106565139, gene26826:106565979, gene28441:106567289, gene37273:106576177	0.00072
13	MF	GO:0016493	C-C chemokine receptor activity	gene29763:100195489, gene40421:106579362, gene42905:106581841, gene5654:106596062, gene6708:106600212	0.00085
14	MF	GO:0030674	protein binding, bridging	gene12239:100194549, gene13787:106607014, gene14147:106607269, gene1426:106609185, gene15601:106608778, gene16063:106609150, gene20721:106613697, gene20824:106613792, gene21338:106560529, gene26108:106565139, gene26209:106565346, gene28441:106567289, gene33543:106572414, gene33594:106572443, gene34595:106573459, gene37138:106576039, gene37273:106576177, gene38104:106576990, gene43271:106582091, g…	0.00132
15	MF	GO:0031686	A1 adenosine receptor binding	gene18767:106611738, gene19986:106613013, gene27435:106566386, gene34008:106572869	0.00133
16	MF	GO:0004879	RNA polymerase II transcription factor a...	gene11900:100136378, gene14213:106607496, gene17688:106610738, gene21752:100136415, gene4157:106582110, gene43593:100136911, gene44423:106583303, gene44664:100136532, gene46613:100196040, gene51815:106590294	0.00156
17	MF	GO:0003700	transcription factor activity, sequence-...	gene10188:106603639, gene10316:106603784, gene10745:106604170, gene11332:106604687, gene11362:106604712, gene11900:100136378, gene12283:106605616, gene12426:106605776, gene13721:106606950, gene13819:106607038, gene13950:106607162, gene13951:106607161, gene14213:106607496, gene14257:106607467, gene1493:106609599, gene16077:106609245, gene16998:106610080, gene17688:106610738, gene17780:106610828, g…	0.00174
18	MF	GO:1901682	sulfur compound transmembrane transporte...	gene11330:106604686, gene26117:106565132, gene27233:106566182, gene33022:106571856, gene35582:106574544, gene44917:100194771	0.00183
19	MF	GO:0020037	heme binding	gene11900:100136378, gene14213:106607496, gene23207:100136926, gene37891:106576803, gene4157:106582110, gene44423:106583303, gene48784:100136916, gene4980:106590030, gene5016:106590330, gene51095:106589556, gene75812:106594198	0.00192
20	MF	GO:0042165	neurotransmitter binding	gene27233:106566182, gene27580:106566494, gene33022:106571856, gene44917:100194771, gene45776:106584498	0.00213
21	MF	GO:0031072	heat shock protein binding	gene18991:106611988, gene19986:106613013, gene20064:106612954, gene25124:106564265, gene26209:106565346, gene27435:106566386, gene2866:106569712, gene29145:106567770, gene34008:106572869, gene39631:106578540, gene43593:100136911, gene44582:100196052, gene48247:106587027, gene51815:106590294, gene5189:106591679, gene7385:106601018, gene771:106601178	0.00219
22	MF	GO:0035591	signaling adaptor activity	gene15601:106608778, gene16063:106609150, gene20721:106613697, gene20824:106613792, gene21338:106560529, gene26108:106565139, gene28441:106567289, gene33594:106572443, gene37138:106576039, gene37273:106576177, gene38104:106576990, gene50301:106588785, gene57355:106592182	0.00269
23	MF	GO:0071855	neuropeptide receptor binding	gene31433:106570295, gene3922:106579439, gene50210:106588640, gene7946:106601574	0.0035
24	MF	GO:0015293	symporter activity	gene12169:106605517, gene16405:106609517, gene16406:106609518, gene27233:106566182, gene27580:106566494, gene28327:106567194, gene2979:100136908, gene33022:106571856, gene37490:100306766, gene37492:106576408, gene3906:106579373, gene43251:106582107, gene43895:106582726, gene44917:100194771, gene45776:106584498, gene47866:106586629	0.00369
25	MF	GO:0004630	phospholipase D activity	gene35671:106574566, gene4980:106590030, gene5016:106590330	0.00481
26	MF	GO:0050682	AF-2 domain binding	gene15578:106608616, gene17688:106610738, gene38727:106577610	0.00481
27	MF	GO:0001221	transcription cofactor binding	gene11900:100136378, gene14213:106607496, gene21752:100136415, gene4157:106582110, gene44423:106583303, gene44664:100136532, gene48856:106587624, gene9442:106602890	0.0051
28	MF	GO:0051082	unfolded protein binding	gene19986:106613013, gene25124:106564265, gene27435:106566386, gene2866:106569712, gene29339:106568146, gene32862:100380418, gene34008:106572869, gene44314:106583068, gene5189:106591679, gene7092:106600736, gene7385:106601018, gene7803:100286590	0.00525
29	MF	GO:0005158	insulin receptor binding	gene14239:106607477, gene15601:106608778, gene20824:106613792, gene21338:106560529, gene33594:106572443, gene38743:106577623, gene50301:106588785, gene7265:106600850	0.00538
30	MF	GO:0003707	steroid hormone receptor activity	gene11900:100136378, gene14213:106607496, gene17688:106610738, gene21752:100136415, gene4157:106582110, gene44423:106583303, gene44664:100136532, gene46613:100196040	0.00597
31	MF	GO:0019899	enzyme binding	gene10970:106604332, gene11499:106604864, gene12426:106605776, gene12981:106606328, gene13298:106606647, gene13721:106606950, gene13758:106606996, gene13819:106607038, gene13950:106607162, gene13951:106607161, gene13954:106607159, gene14239:106607477, gene14257:106607467, gene14861:106608044, gene15578:106608616, gene15601:106608778, gene15839:106608947, gene16063:106609150, gene16375:106609395, …	0.00672
32	MF	GO:0005365	myo-inositol transmembrane transporter a...	gene43251:106582107, gene47866:106586629	0.00783
33	MF	GO:0016501	prostacyclin receptor activity	gene21752:100136415, gene44664:100136532	0.00783
34	MF	GO:0008144	drug binding	gene10970:106604332, gene15897:106608992, gene21752:100136415, gene26209:106565346, gene42905:106581841, gene44582:100196052, gene44664:100136532, gene45278:106584037, gene46592:106585604, gene48247:106587027, gene48856:106587624, gene6708:106600212, gene9916:106603240	0.00814
35	MF	GO:0031690	adrenergic receptor binding	gene16375:106609395, gene23866:106563080, gene2731:106568345, gene27730:106566645, gene45278:106584037, gene46592:106585604	0.00857
36	MF	GO:0000980	RNA polymerase II distal enhancer sequen...	gene10188:106603639, gene12283:106605616, gene13819:106607038, gene17688:106610738, gene22999:106562092, gene28770:106567727, gene35149:106574039, gene3772:106577891, gene39631:106578540, gene42916:106581833, gene48548:106587185, gene48856:106587624, gene75812:106594198, gene771:106601178	0.00996
37	MF	GO:0099600	transmembrane receptor activity	gene10970:106604332, gene11572:106604929, gene13469:106606823, gene13758:106606996, gene16790:106609880, gene16874:106609958, gene18767:106611738, gene21752:100136415, gene22400:100136366, gene22911:106562160, gene22974:106562111, gene239:106562016, gene26498:106565668, gene26770:106565734, gene2715:106567959, gene27167:106566109, gene2772:106568685, gene27731:100136370, gene28816:106567683, gene…	0.01028
38	MF	GO:0070539	linoleic acid binding	gene21752:100136415, gene44664:100136532	0.01079
39	MF	GO:0015272	ATP-activated inward rectifier potassium...	gene28816:106567683, gene42360:106581096	0.01079
40	MF	GO:0005070	SH3/SH2 adaptor activity	gene16063:106609150, gene20721:106613697, gene28441:106567289, gene33594:106572443, gene37138:106576039, gene37273:106576177, gene38104:106576990, gene50301:106588785, gene57355:106592182	0.01243
41	MF	GO:0070080	titin Z domain binding	gene12239:100194549, gene14147:106607269	0.01416
42	MF	GO:0004740	pyruvate dehydrogenase (acetyl-transferr...	gene14239:106607477, gene7265:106600850	0.01416
43	MF	GO:0017129	triglyceride binding	gene21903:106560849, gene34746:106573721	0.01416
44	MF	GO:0001013	RNA polymerase I regulatory region DNA b...	gene30398:100196464, gene33633:106572480	0.01416
45	MF	GO:0044389	ubiquitin-like protein ligase binding	gene15578:106608616, gene18957:106611923, gene19986:106613013, gene20491:106613496, gene21338:106560529, gene23183:106562338, gene2359:106564650, gene23866:106563080, gene2731:106568345, gene27435:106566386, gene28692:106567574, gene30097:100301980, gene30132:106568833, gene30455:106569312, gene30708:106569597, gene33633:106572480, gene34008:106572869, gene38210:106577138, gene38727:106577610, ge…	0.01538
46	MF	GO:0001223	transcription coactivator binding	gene21752:100136415, gene44664:100136532, gene48856:106587624, gene9442:106602890	0.01558
47	MF	GO:0004935	adrenergic receptor activity	gene10970:106604332, gene11572:106604929, gene46592:106585604	0.01629
48	MF	GO:0023023	MHC protein complex binding	gene19986:106613013, gene27435:106566386, gene32862:100380418, gene34008:106572869	0.01691
49	MF	GO:0023026	MHC class II protein complex binding	gene19986:106613013, gene27435:106566386, gene32862:100380418, gene34008:106572869	0.01691
50	MF	GO:0008227	G-protein coupled amine receptor activit...	gene10970:106604332, gene11572:106604929, gene46592:106585604, gene46808:106585411	0.01691
51	MF	GO:0038023	signaling receptor activity	gene10970:106604332, gene11572:106604929, gene11900:100136378, gene13469:106606823, gene13758:106606996, gene14213:106607496, gene16790:106609880, gene16874:106609958, gene17688:106610738, gene18767:106611738, gene21752:100136415, gene22911:106562160, gene22974:106562111, gene239:106562016, gene26498:106565668, gene26770:106565734, gene2715:106567959, gene27167:106566109, gene2772:106568685, gene…	0.01734
52	MF	GO:0004939	beta-adrenergic receptor activity	gene10970:106604332, gene46592:106585604	0.01793
53	MF	GO:0008269	JAK pathway signal transduction adaptor ...	gene28441:106567289, gene37273:106576177	0.01793
54	MF	GO:0005086	ARF guanyl-nucleotide exchange factor ac...	gene19122:106612116, gene27776:106566761, gene33585:106572434, gene51396:106589836	0.01831
55	MF	GO:0008134	transcription factor binding	gene10745:106604170, gene11870:100195869, gene11900:100136378, gene13721:106606950, gene13819:106607038, gene13950:106607162, gene13951:106607161, gene13954:106607159, gene14213:106607496, gene15578:106608616, gene17688:106610738, gene18957:106611923, gene19280:106612265, gene19475:106612460, gene19986:106613013, gene21338:106560529, gene21752:100136415, gene21822:106560921, gene22999:106562092, …	0.01875
56	MF	GO:0004930	G-protein coupled receptor activity	gene10970:106604332, gene11572:106604929, gene13469:106606823, gene16874:106609958, gene18767:106611738, gene21752:100136415, gene239:106562016, gene26498:106565668, gene26770:106565734, gene27167:106566109, gene2772:106568685, gene27731:100136370, gene29763:100195489, gene30132:106568833, gene31261:106569878, gene34016:106572862, gene39138:106578013, gene40421:106579362, gene42905:106581841, gen…	0.01881
57	MF	GO:0015172	acidic amino acid transmembrane transpor...	gene11330:106604686, gene28327:106567194, gene43895:106582726	0.02044
58	MF	GO:0031625	ubiquitin protein ligase binding	gene15578:106608616, gene18957:106611923, gene19986:106613013, gene20491:106613496, gene21338:106560529, gene23183:106562338, gene2359:106564650, gene23866:106563080, gene2731:106568345, gene27435:106566386, gene28692:106567574, gene30097:100301980, gene30132:106568833, gene30455:106569312, gene30708:106569597, gene34008:106572869, gene38210:106577138, gene38727:106577610, gene42905:106581841, ge…	0.02088
59	MF	GO:0042805	actinin binding	gene16375:106609395, gene27730:106566645, gene28380:106567236, gene29975:106568959, gene36388:106575303, gene48537:106587193, gene49260:106588037, gene771:106601178	0.02117
60	MF	GO:0005310	dicarboxylic acid transmembrane transpor...	gene11330:106604686, gene26117:106565132, gene28327:106567194, gene43895:106582726	0.02131
61	MF	GO:0043733	DNA-3-methylbase glycosylase activity	gene14024:106607370, gene7495:106601084	0.02206
62	MF	GO:0051373	FATZ binding	gene12239:100194549, gene14147:106607269	0.02206
63	MF	GO:0016712	oxidoreductase activity, acting on paire...	gene23207:100136926, gene37891:106576803, gene48784:100136916	0.02271
64	MF	GO:0016494	C-X-C chemokine receptor activity	gene29763:100195489, gene42905:106581841, gene6708:106600212	0.02271
65	MF	GO:0004888	transmembrane signaling receptor activit...	gene10970:106604332, gene11572:106604929, gene13469:106606823, gene13758:106606996, gene16790:106609880, gene16874:106609958, gene18767:106611738, gene21752:100136415, gene22911:106562160, gene22974:106562111, gene239:106562016, gene26498:106565668, gene26770:106565734, gene2715:106567959, gene27167:106566109, gene2772:106568685, gene27731:100136370, gene29763:100195489, gene30132:106568833, gene…	0.02497
66	MF	GO:0019957	C-C chemokine binding	gene29763:100195489, gene40421:106579362, gene5654:106596062	0.02511
67	MF	GO:0038121	C-C motif chemokine 21 receptor activity	gene29763:100195489, gene40421:106579362	0.02655
68	MF	GO:0038117	C-C motif chemokine 19 receptor activity	gene29763:100195489, gene40421:106579362	0.02655
69	MF	GO:0005451	monovalent cation:proton antiporter acti...	gene35081:106573936, gene47988:106586777	0.02655
70	MF	GO:0035240	dopamine binding	gene10970:106604332, gene46592:106585604	0.02655
71	MF	GO:0035757	chemokine (C-C motif) ligand 19 binding	gene29763:100195489, gene40421:106579362	0.02655
72	MF	GO:0035758	chemokine (C-C motif) ligand 21 binding	gene29763:100195489, gene40421:106579362	0.02655
73	MF	GO:0070330	aromatase activity	gene23207:100136926, gene48784:100136916	0.02655
74	MF	GO:0051380	norepinephrine binding	gene10970:106604332, gene46592:106585604	0.02655
75	MF	GO:0051379	epinephrine binding	gene10970:106604332, gene46592:106585604	0.02655
76	MF	GO:0017127	cholesterol transporter activity	gene16790:106609880, gene21903:106560849, gene34746:106573721	0.02764
77	MF	GO:0072349	modified amino acid transmembrane transp...	gene11330:106604686, gene27580:106566494, gene35582:106574544	0.02764
78	MF	GO:0015101	organic cation transmembrane transporter...	gene18047:106611136, gene217:106560243, gene38905:106577803	0.02764
79	MF	GO:0001222	transcription corepressor binding	gene11900:100136378, gene14213:106607496, gene4157:106582110, gene44423:106583303	0.02817
80	MF	GO:0008140	cAMP response element binding protein bi...	gene19475:106612460, gene21822:106560921, gene39631:106578540, gene50303:106588784	0.02817
81	MF	GO:0043024	ribosomal small subunit binding	gene10424:106603870, gene27572:106566482, gene45475:106584219, gene7803:100286590	0.02817
82	MF	GO:0001228	transcriptional activator activity, RNA ...	gene13721:106606950, gene13819:106607038, gene13950:106607162, gene17688:106610738, gene19148:106612139, gene20042:106612968, gene21752:100136415, gene22999:106562092, gene29145:106567770, gene30398:100196464, gene32601:106571544, gene33633:106572480, gene38210:106577138, gene39192:106578083, gene39631:106578540, gene41894:100136356, gene42916:106581833, gene44237:106583131, gene44664:100136532, …	0.02822
83	MF	GO:0000987	core promoter proximal region sequence-s...	gene11900:100136378, gene13721:106606950, gene13819:106607038, gene13950:106607162, gene14213:106607496, gene16077:106609245, gene17688:106610738, gene19148:106612139, gene21752:100136415, gene22999:106562092, gene29145:106567770, gene30097:100301980, gene30398:100196464, gene30708:106569597, gene32601:106571544, gene33633:106572480, gene33738:106572630, gene38210:106577138, gene39192:106578083, …	0.02823
84	MF	GO:0001159	core promoter proximal region DNA bindin...	gene11900:100136378, gene13721:106606950, gene13819:106607038, gene13950:106607162, gene14213:106607496, gene16077:106609245, gene17688:106610738, gene19148:106612139, gene21752:100136415, gene22999:106562092, gene29145:106567770, gene30097:100301980, gene30398:100196464, gene30708:106569597, gene32601:106571544, gene33633:106572480, gene33738:106572630, gene38210:106577138, gene39192:106578083, …	0.02823
85	MF	GO:0005243	gap junction channel activity	gene18134:106611221, gene20083:106613089, gene9833:100194921	0.0303
86	MF	GO:0004874	aryl hydrocarbon receptor activity	gene43593:100136911, gene51815:106590294	0.03136
87	MF	GO:0042826	histone deacetylase binding	gene19475:106612460, gene21822:106560921, gene30314:106569201, gene30398:100196464, gene320:106570052, gene32945:106571833, gene33633:106572480, gene35149:106574039, gene44237:106583131, gene46613:100196040, gene50303:106588784, gene52402:106590982, gene5434:106593991, gene5437:106594023, gene5454:106594195, gene63321:106591221	0.0314
88	MF	GO:0055103	ligase regulator activity	gene18339:106611380, gene25693:106564893, gene4609:106588430, gene50696:106589124	0.03203
89	MF	GO:0052827	inositol pentakisphosphate phosphatase a...	gene28397:106567250, gene33222:106572218, gene40373:106579160, gene7355:100195269	0.03408
90	MF	GO:0008138	protein tyrosine/serine/threonine phosph...	gene2257:106563492, gene2341:106564343, gene28397:106567250, gene33222:106572218, gene34283:106573116, gene40373:106579160, gene7355:100195269	0.03474
91	MF	GO:0015248	sterol transporter activity	gene16790:106609880, gene21903:106560849, gene34746:106573721	0.03602
92	MF	GO:0043023	ribosomal large subunit binding	gene10424:106603870, gene45475:106584219, gene7803:100286590	0.03602
93	MF	GO:0017017	MAP kinase tyrosine/serine/threonine pho...	gene2257:106563492, gene2341:106564343, gene33222:106572218, gene34283:106573116	0.03839
94	MF	GO:0042277	peptide binding	gene11497:106604868, gene19986:106613013, gene21338:106560529, gene27167:106566109, gene27435:106566386, gene2781:106568818, gene2866:106569712, gene28816:106567683, gene31261:106569878, gene34008:106572869, gene38905:106577803, gene42360:106581096, gene43983:106582826, gene44744:106583415, gene47804:106586587, gene50823:106589219, gene51019:106589495, gene51351:106589791, gene771:106601178	0.03849
95	MF	GO:0004726	non-membrane spanning protein tyrosine p...	gene2257:106563492, gene29582:106568503, gene33594:106572443	0.03907
96	MF	GO:0015370	solute:sodium symporter activity	gene12169:106605517, gene27233:106566182, gene27580:106566494, gene28327:106567194, gene33022:106571856, gene3906:106579373, gene43251:106582107, gene44917:100194771, gene45776:106584498, gene47866:106586629	0.04114
97	MF	GO:0004676	3-phosphoinositide-dependent protein kin...	gene14239:106607477, gene7265:106600850	0.04193
98	MF	GO:0031699	beta-3 adrenergic receptor binding	gene23866:106563080, gene2731:106568345	0.04193
99	MF	GO:0008092	cytoskeletal protein binding	gene11499:106604864, gene12239:100194549, gene14147:106607269, gene15553:106608638, gene15578:106608616, gene16375:106609395, gene17851:106610840, gene18339:106611380, gene18791:106611717, gene18957:106611923, gene19299:106612280, gene19554:106612708, gene21124:106560302, gene21842:106560903, gene22434:106561595, gene2255:106563467, gene2341:106564343, gene24057:106563294, gene26209:106565346, ge…	0.04219
100	MF	GO:0048273	mitogen-activated protein kinase p38 bin...	gene22999:106562092, gene48548:106587185, gene48856:106587624	0.04225
101	MF	GO:0051393	alpha-actinin binding	gene16375:106609395, gene27730:106566645, gene28380:106567236, gene29975:106568959, gene36388:106575303, gene49260:106588037	0.04291
102	MF	GO:0000978	RNA polymerase II core promoter proximal...	gene11900:100136378, gene13721:106606950, gene13819:106607038, gene13950:106607162, gene14213:106607496, gene16077:106609245, gene17688:106610738, gene19148:106612139, gene21752:100136415, gene22999:106562092, gene29145:106567770, gene30097:100301980, gene30398:100196464, gene30708:106569597, gene32601:106571544, gene33633:106572480, gene33738:106572630, gene38210:106577138, gene39192:106578083, …	0.04602
103	MF	GO:0047555	3',5'-cyclic-GMP phosphodiesterase activ...	gene43038:106581900, gene9916:106603240	0.04764
104	MF	GO:0015485	cholesterol binding	gene16790:106609880, gene21903:106560849, gene33594:106572443, gene34746:106573721, gene49653:106588203	0.0486
105	MF	GO:0004872	receptor activity	gene10970:106604332, gene11572:106604929, gene11900:100136378, gene11922:106605285, gene13469:106606823, gene13758:106606996, gene14213:106607496, gene16790:106609880, gene16874:106609958, gene17688:106610738, gene18767:106611738, gene21752:100136415, gene22400:100136366, gene22911:106562160, gene22974:106562111, gene239:106562016, gene26498:106565668, gene26770:106565734, gene2715:106567959, gen…	0.0495
106	BP	GO:0003333	amino acid transmembrane transport	gene11330:106604686, gene12169:106605517, gene16405:106609517, gene16406:106609518, gene17103:106610197, gene27233:106566182, gene27580:106566494, gene28327:106567194, gene33022:106571856, gene37490:100306766, gene37492:106576408, gene38905:106577803, gene3906:106579373, gene43895:106582726, gene44917:100194771, gene45776:106584498	5e-08
107	BP	GO:0048662	negative regulation of smooth muscle cel...	gene15578:106608616, gene18957:106611923, gene21338:106560529, gene21752:100136415, gene23931:106563105, gene31261:106569878, gene38727:106577610, gene44664:100136532, gene4980:106590030, gene5016:106590330, gene50696:106589124	7.8e-06
108	BP	GO:0045668	negative regulation of osteoblast differ...	gene11332:106604687, gene12172:106605519, gene13951:106607161, gene22999:106562092, gene2715:106567959, gene30708:106569597, gene32945:106571833, gene3903:106579350, gene40238:106579272, gene48548:106587185, gene48856:106587624, gene52402:106590982, gene5434:106593991, gene5437:106594023, gene5454:106594195, gene57355:106592182, gene63321:106591221	2.5e-05
109	BP	GO:0010871	negative regulation of receptor biosynth...	gene11900:100136378, gene14213:106607496, gene21752:100136415, gene23931:106563105, gene4157:106582110, gene44423:106583303, gene44664:100136532	2.8e-05
110	BP	GO:0032570	response to progesterone	gene10970:106604332, gene11362:106604712, gene13819:106607038, gene19986:106613013, gene21338:106560529, gene27435:106566386, gene2772:106568685, gene30455:106569312, gene34008:106572869, gene37891:106576803, gene6476:106599272, gene9833:100194921, gene989:106602906	0.0001
111	BP	GO:0007588	excretion	gene11572:106604929, gene22999:106562092, gene2772:106568685, gene28816:106567683, gene2979:100136908, gene31261:106569878, gene31433:106570295, gene42360:106581096, gene47804:106586587, gene48548:106587185, gene4980:106590030, gene5016:106590330, gene51222:100195417	0.0001
112	BP	GO:0015804	neutral amino acid transport	gene11330:106604686, gene12169:106605517, gene16405:106609517, gene24289:106563501, gene27233:106566182, gene33022:106571856, gene37490:100306766, gene37492:106576408, gene38905:106577803, gene3906:106579373, gene44917:100194771	0.00011
113	BP	GO:0071850	mitotic cell cycle arrest	gene16375:106609395, gene21150:106560326, gene2257:106563492, gene27730:106566645, gene45383:106584172, gene46613:100196040, gene6159:106598934	0.00012
114	BP	GO:0006814	sodium ion transport	gene10970:106604332, gene15839:106608947, gene16375:106609395, gene16405:106609517, gene16406:106609518, gene18791:106611717, gene19475:106612460, gene19554:106612708, gene21822:106560921, gene27233:106566182, gene27580:106566494, gene27730:106566645, gene28327:106567194, gene28380:106567236, gene28816:106567683, gene2979:100136908, gene30097:100301980, gene31486:106570356, gene33022:106571856, g…	0.00014
115	BP	GO:0051591	response to cAMP	gene11362:106604712, gene13819:106607038, gene14257:106607467, gene15578:106608616, gene15839:106608947, gene21338:106560529, gene22400:100136366, gene2257:106563492, gene239:106562016, gene29156:106567763, gene30097:100301980, gene30144:106568821, gene37891:106576803, gene38210:106577138, gene38727:106577610, gene39631:106578540, gene43593:100136911, gene45278:106584037, gene47505:106586264, gen…	0.00019
116	BP	GO:0070859	positive regulation of bile acid biosynt...	gene11900:100136378, gene14213:106607496, gene4157:106582110, gene44423:106583303	0.00019
117	BP	GO:0071222	cellular response to lipopolysaccharide	gene11900:100136378, gene13819:106607038, gene14213:106607496, gene15578:106608616, gene15839:106608947, gene16790:106609880, gene18767:106611738, gene18957:106611923, gene21752:100136415, gene239:106562016, gene33633:106572480, gene33996:100195428, gene38727:106577610, gene4157:106582110, gene43038:106581900, gene44423:106583303, gene44664:100136532, gene45278:106584037, gene45561:106584319, gen…	0.0002
118	BP	GO:0032922	circadian regulation of gene expression	gene11332:106604687, gene11900:100136378, gene14213:106607496, gene15578:106608616, gene18957:106611923, gene21752:100136415, gene28692:106567574, gene29145:106567770, gene30097:100301980, gene38727:106577610, gene39631:106578540, gene4157:106582110, gene43593:100136911, gene44423:106583303, gene44664:100136532	0.00024
119	BP	GO:0010745	negative regulation of macrophage derive...	gene16790:106609880, gene21752:100136415, gene21903:106560849, gene23931:106563105, gene34746:106573721, gene44664:100136532, gene771:106601178	0.00025
120	BP	GO:0035634	response to stilbenoid	gene15578:106608616, gene18957:106611923, gene38727:106577610	0.00044
121	BP	GO:0007329	positive regulation of transcription fro...	gene15578:106608616, gene18957:106611923, gene38727:106577610	0.00044
122	BP	GO:2000184	positive regulation of progesterone bios...	gene15578:106608616, gene18957:106611923, gene38727:106577610	0.00044
123	BP	GO:0036273	response to statin	gene15578:106608616, gene18957:106611923, gene38727:106577610	0.00044
124	BP	GO:0035094	response to nicotine	gene11330:106604686, gene15839:106608947, gene20824:106613792, gene21752:100136415, gene33996:100195428, gene39631:106578540, gene44664:100136532, gene4980:106590030, gene5016:106590330, gene50210:106588640, gene771:106601178	0.00045
125	BP	GO:0042752	regulation of circadian rhythm	gene11332:106604687, gene11900:100136378, gene14213:106607496, gene15578:106608616, gene18957:106611923, gene19475:106612460, gene21752:100136415, gene21822:106560921, gene2772:106568685, gene28692:106567574, gene29145:106567770, gene30097:100301980, gene38727:106577610, gene39631:106578540, gene4157:106582110, gene44423:106583303, gene44664:100136532, gene50303:106588784, gene51351:106589791	0.00048
126	BP	GO:0032355	response to estradiol	gene11362:106604712, gene13830:106607028, gene15578:106608616, gene18957:106611923, gene19986:106613013, gene21268:106560450, gene21338:106560529, gene2257:106563492, gene26108:106565139, gene26826:106565979, gene27435:106566386, gene28441:106567289, gene29339:106568146, gene30455:106569312, gene33996:100195428, gene34008:106572869, gene37273:106576177, gene37891:106576803, gene38727:106577610, g…	0.00055
127	BP	GO:0051085	chaperone mediated protein folding requi...	gene19986:106613013, gene25124:106564265, gene27435:106566386, gene34008:106572869, gene5189:106591679	0.00056
128	BP	GO:0060086	circadian temperature homeostasis	gene11900:100136378, gene14213:106607496, gene4157:106582110, gene44423:106583303	0.00059
129	BP	GO:0014912	negative regulation of smooth muscle cel...	gene15578:106608616, gene15839:106608947, gene18957:106611923, gene21752:100136415, gene23931:106563105, gene38727:106577610, gene44664:100136532, gene50696:106589124	0.00064
130	BP	GO:0051384	response to glucocorticoid	gene10970:106604332, gene13819:106607038, gene15578:106608616, gene15839:106608947, gene16874:106609958, gene20824:106613792, gene21338:106560529, gene2257:106563492, gene239:106562016, gene28816:106567683, gene30398:100196464, gene31486:106570356, gene37891:106576803, gene38727:106577610, gene41158:106580039, gene42360:106581096, gene43593:100136911, gene44744:106583415, gene48247:106587027, gen…	0.00069
131	BP	GO:0060452	positive regulation of cardiac muscle co...	gene11572:106604929, gene13830:106607028, gene21124:106560302, gene21268:106560450, gene32862:100380418, gene6061:106598526	0.00084
132	BP	GO:0035865	cellular response to potassium ion	gene13758:106606996, gene15578:106608616, gene15839:106608947, gene18957:106611923, gene38727:106577610	0.0009
133	BP	GO:1901860	positive regulation of mitochondrial DNA...	gene15578:106608616, gene18957:106611923, gene38727:106577610	0.00102
134	BP	GO:1901558	response to metformin	gene15578:106608616, gene18957:106611923, gene38727:106577610	0.00102
135	BP	GO:0035995	detection of muscle stretch	gene12239:100194549, gene14147:106607269, gene49260:106588037	0.00102
136	BP	GO:0042026	protein refolding	gene19986:106613013, gene25124:106564265, gene27435:106566386, gene2866:106569712, gene32862:100380418, gene34008:106572869, gene5189:106591679, gene7092:106600736, gene7385:106601018	0.00102
137	BP	GO:0071456	cellular response to hypoxia	gene10424:106603870, gene10970:106604332, gene13721:106606950, gene13950:106607162, gene14239:106607477, gene15578:106608616, gene15839:106608947, gene17851:106610840, gene18957:106611923, gene21752:100136415, gene30432:106569334, gene38727:106577610, gene3903:106579350, gene44664:100136532, gene45475:106584219, gene46613:100196040, gene47988:106586777, gene4980:106590030, gene5016:106590330, gen…	0.00109
138	BP	GO:0035864	response to potassium ion	gene13758:106606996, gene15578:106608616, gene15839:106608947, gene18957:106611923, gene28816:106567683, gene38727:106577610, gene42360:106581096, gene44299:106583079, gene48247:106587027	0.00111
139	BP	GO:0051552	flavone metabolic process	gene15578:106608616, gene18957:106611923, gene38727:106577610	0.00143
140	BP	GO:0001997	positive regulation of the force of hear...	gene10970:106604332, gene11572:106604929, gene46592:106585604	0.00143
141	BP	GO:1903646	positive regulation of chaperone-mediate...	gene19986:106613013, gene27435:106566386, gene34008:106572869	0.00143
142	BP	GO:1902904	negative regulation of fibril organizati...	gene19986:106613013, gene27435:106566386, gene34008:106572869	0.00143
143	BP	GO:0048769	sarcomerogenesis	gene12239:100194549, gene14147:106607269, gene32862:100380418, gene49260:106588037	0.00166
144	BP	GO:0051385	response to mineralocorticoid	gene13819:106607038, gene13830:106607028, gene21268:106560450, gene28816:106567683, gene42360:106581096, gene48247:106587027, gene50210:106588640, gene7075:106600703, gene989:106602906	0.00176
145	BP	GO:0071248	cellular response to metal ion	gene13758:106606996, gene13819:106607038, gene15578:106608616, gene15839:106608947, gene18339:106611380, gene18957:106611923, gene19986:106613013, gene21390:106560584, gene22999:106562092, gene23370:106562514, gene25257:106564400, gene27435:106566386, gene28816:106567683, gene30398:100196464, gene32973:106571827, gene33996:100195428, gene34008:106572869, gene38727:106577610, gene39631:106578540, …	0.00179
146	BP	GO:0001816	cytokine production	gene10440:106603888, gene12283:106605616, gene13241:106606595, gene15839:106608947, gene15897:106608992, gene16790:106609880, gene18767:106611738, gene19554:106612708, gene21150:106560326, gene21338:106560529, gene21413:106560604, gene22999:106562092, gene239:106562016, gene23931:106563105, gene2424:106565855, gene2772:106568685, gene28044:106567318, gene29763:100195489, gene30097:100301980, gene…	0.00189
147	BP	GO:0032764	negative regulation of mast cell cytokin...	gene21413:106560604, gene4980:106590030, gene5016:106590330	0.00193
148	BP	GO:0010868	negative regulation of triglyceride bios...	gene19475:106612460, gene21822:106560921, gene50303:106588784	0.00193
149	BP	GO:0006835	dicarboxylic acid transport	gene11330:106604686, gene16405:106609517, gene18791:106611717, gene26117:106565132, gene28327:106567194, gene28816:106567683, gene37490:100306766, gene37492:106576408, gene3932:106579570, gene42360:106581096, gene43895:106582726, gene46456:106585027, gene55940:106599863	0.00198
150	BP	GO:0045600	positive regulation of fat cell differen...	gene10188:106603639, gene11332:106604687, gene12283:106605616, gene21752:100136415, gene28770:106567727, gene30398:100196464, gene33633:106572480, gene3772:106577891, gene39631:106578540, gene44664:100136532, gene47694:106586462, gene50592:106589020	0.0021
151	BP	GO:0034144	negative regulation of toll-like recepto...	gene11900:100136378, gene14213:106607496, gene4157:106582110, gene44423:106583303	0.00233
152	BP	GO:0051930	regulation of sensory perception of pain	gene10970:106604332, gene2715:106567959, gene28816:106567683, gene42360:106581096, gene45851:106584574, gene47988:106586777, gene50210:106588640	0.0024
153	BP	GO:0044252	negative regulation of multicellular org...	gene21752:100136415, gene23866:106563080, gene2731:106568345, gene44664:100136532, gene47505:106586264	0.0025
154	BP	GO:0072318	clathrin coat disassembly	gene19986:106613013, gene27435:106566386, gene34008:106572869	0.00253
155	BP	GO:0072337	modified amino acid transport	gene11330:106604686, gene16405:106609517, gene27580:106566494, gene35582:106574544, gene37490:100306766, gene37492:106576408	0.00253
156	BP	GO:0046321	positive regulation of fatty acid oxidat...	gene15578:106608616, gene15601:106608778, gene18957:106611923, gene21752:100136415, gene38727:106577610, gene44664:100136532, gene47911:106586664	0.00259
157	BP	GO:0007589	body fluid secretion	gene10745:106604170, gene14257:106607467, gene18767:106611738, gene19280:106612265, gene25498:106564692, gene26108:106565139, gene26826:106565979, gene2772:106568685, gene28441:106567289, gene30455:106569312, gene31261:106569878, gene31433:106570295, gene37273:106576177, gene39631:106578540, gene46592:106585604, gene4714:106587516	0.0026
158	BP	GO:2000189	positive regulation of cholesterol homeo...	gene11900:100136378, gene14213:106607496, gene4157:106582110, gene44423:106583303	0.00272
159	BP	GO:0035947	regulation of gluconeogenesis by regulat...	gene11900:100136378, gene14213:106607496, gene4157:106582110, gene44423:106583303, gene9442:106602890	0.00279
160	BP	GO:0015695	organic cation transport	gene18047:106611136, gene217:106560243, gene35081:106573936, gene35582:106574544, gene38905:106577803	0.00279
161	BP	GO:0071371	cellular response to gonadotropin stimul...	gene15578:106608616, gene15839:106608947, gene18957:106611923, gene37891:106576803, gene38210:106577138, gene38727:106577610	0.00301
162	BP	GO:0040015	negative regulation of multicellular org...	gene26108:106565139, gene26826:106565979, gene28441:106567289, gene37273:106576177, gene46592:106585604	0.00311
163	BP	GO:0006111	regulation of gluconeogenesis	gene11900:100136378, gene14213:106607496, gene14239:106607477, gene19475:106612460, gene21752:100136415, gene21822:106560921, gene38727:106577610, gene4157:106582110, gene44423:106583303, gene44664:100136532, gene50303:106588784, gene7265:106600850, gene9442:106602890	0.00313
164	BP	GO:0002408	myeloid dendritic cell chemotaxis	gene2424:106565855, gene29763:100195489, gene40421:106579362	0.00323
165	BP	GO:0071250	cellular response to nitrite	gene15578:106608616, gene18957:106611923, gene38727:106577610	0.00323
166	BP	GO:0055078	sodium ion homeostasis	gene2772:106568685, gene2979:100136908, gene31261:106569878, gene31433:106570295, gene31486:106570356, gene47988:106586777, gene51222:100195417, gene9905:106603367	0.00326
167	BP	GO:0006954	inflammatory response	gene10316:106603784, gene10970:106604332, gene11900:100136378, gene13241:106606595, gene14213:106607496, gene15839:106608947, gene16164:106609323, gene21413:106560604, gene21752:100136415, gene22974:106562111, gene239:106562016, gene25257:106564400, gene26624:106565874, gene2772:106568685, gene2866:106569712, gene28816:106567683, gene29145:106567770, gene29763:100195489, gene30097:100301980, gene…	0.00346
168	BP	GO:0006195	purine nucleotide catabolic process	gene14024:106607370, gene15897:106608992, gene16418:106609526, gene43038:106581900, gene45278:106584037, gene51776:106590221, gene7495:106601084, gene816:106601984, gene9916:106603240	0.00363
169	BP	GO:0051546	keratinocyte migration	gene15839:106608947, gene21752:100136415, gene33996:100195428, gene44664:100136532, gene4692:106586538	0.00382
170	BP	GO:0015812	gamma-aminobutyric acid transport	gene27233:106566182, gene27580:106566494, gene33022:106571856, gene44917:100194771, gene45776:106584498	0.00382
171	BP	GO:0043502	regulation of muscle adaptation	gene15578:106608616, gene18957:106611923, gene21124:106560302, gene22999:106562092, gene27786:106566751, gene29156:106567763, gene38727:106577610, gene43038:106581900, gene46592:106585604, gene47988:106586777, gene48548:106587185, gene48856:106587624, gene51222:100195417, gene6061:106598526	0.00393
172	BP	GO:1900034	regulation of cellular response to heat	gene19986:106613013, gene25124:106564265, gene26209:106565346, gene27435:106566386, gene32862:100380418, gene34008:106572869, gene44582:100196052, gene5189:106591679, gene7092:106600736, gene7385:106601018	0.00413
173	BP	GO:0032328	alanine transport	gene16405:106609517, gene37490:100306766, gene37492:106576408, gene38905:106577803	0.00416
174	BP	GO:0010519	negative regulation of phospholipase act...	gene21124:106560302, gene45561:106584319, gene6061:106598526, gene6180:100194912	0.00416
175	BP	GO:0071415	cellular response to purine-containing c...	gene15578:106608616, gene18767:106611738, gene18957:106611923, gene38727:106577610	0.00416
176	BP	GO:0071871	response to epinephrine	gene15578:106608616, gene18957:106611923, gene38727:106577610, gene43038:106581900, gene45278:106584037, gene47988:106586777	0.00485
177	BP	GO:0046717	acid secretion	gene16405:106609517, gene18767:106611738, gene18791:106611717, gene19306:106612291, gene31486:106570356, gene37490:100306766, gene37492:106576408, gene3932:106579570, gene46456:106585027, gene46808:106585411, gene47988:106586777, gene50210:106588640, gene55940:106599863	0.0049
178	BP	GO:0006787	porphyrin-containing compound catabolic ...	gene4980:106590030, gene5016:106590330, gene725:106601609	0.00495
179	BP	GO:0060854	patterning of lymph vessels	gene22999:106562092, gene48548:106587185, gene48856:106587624	0.00495
180	BP	GO:0046149	pigment catabolic process	gene4980:106590030, gene5016:106590330, gene725:106601609	0.00495
181	BP	GO:0051152	positive regulation of smooth muscle cel...	gene22229:106561399, gene2781:106568818, gene34413:106573165, gene51008:106589488, gene7485:106601093	0.00509
182	BP	GO:0000122	negative regulation of transcription fro...	gene10188:106603639, gene10424:106603870, gene10745:106604170, gene11900:100136378, gene12283:106605616, gene13819:106607038, gene13951:106607161, gene14213:106607496, gene14257:106607467, gene16077:106609245, gene17688:106610738, gene19280:106612265, gene19475:106612460, gene20042:106612968, gene21413:106560604, gene21752:100136415, gene21822:106560921, gene22307:106561473, gene22999:106562092, …	0.0051
183	BP	GO:0010874	regulation of cholesterol efflux	gene16790:106609880, gene21752:100136415, gene21903:106560849, gene23931:106563105, gene34746:106573721, gene771:106601178	0.00522
184	BP	GO:0061469	regulation of type B pancreatic cell pro...	gene11900:100136378, gene14213:106607496, gene4157:106582110, gene44423:106583303	0.00536
185	BP	GO:0070294	renal sodium ion absorption	gene28816:106567683, gene2979:100136908, gene31486:106570356, gene42360:106581096	0.00536
186	BP	GO:0030240	skeletal muscle thin filament assembly	gene12239:100194549, gene14147:106607269, gene32862:100380418, gene49260:106588037	0.00536
187	BP	GO:0071880	adenylate cyclase-activating adrenergic ...	gene10970:106604332, gene11572:106604929, gene45278:106584037, gene46592:106585604	0.00536
188	BP	GO:1902624	positive regulation of neutrophil migrat...	gene2424:106565855, gene2772:106568685, gene29763:100195489, gene3980:106580063, gene40421:106579362, gene43924:106582757, gene50210:106588640	0.0054
189	BP	GO:0018990	ecdysis, chitin-based cuticle	gene14213:106607496, gene4157:106582110	0.00541
190	BP	GO:0034197	triglyceride transport	gene21903:106560849, gene34746:106573721	0.00541
191	BP	GO:1902943	positive regulation of voltage-gated chl...	gene22400:100136366, gene239:106562016	0.00541
192	BP	GO:0009612	response to mechanical stimulus	gene11362:106604712, gene11870:100195869, gene12239:100194549, gene13819:106607038, gene13951:106607161, gene14147:106607269, gene15839:106608947, gene16077:106609245, gene16405:106609517, gene18791:106611717, gene21150:106560326, gene25135:106564279, gene2772:106568685, gene2979:100136908, gene32664:106571469, gene33996:100195428, gene36361:106575280, gene37490:100306766, gene37492:106576408, ge…	0.00558
193	BP	GO:0007568	aging	gene10970:106604332, gene11362:106604712, gene11572:106604929, gene13830:106607028, gene14257:106607467, gene15578:106608616, gene15601:106608778, gene15839:106608947, gene18767:106611738, gene18957:106611923, gene19986:106613013, gene20064:106612954, gene20824:106613792, gene21268:106560450, gene21338:106560529, gene21413:106560604, gene24057:106563294, gene26108:106565139, gene26826:106565979, …	0.00581
194	BP	GO:0002703	regulation of leukocyte mediated immunit...	gene14239:106607477, gene15897:106608992, gene19986:106613013, gene21413:106560604, gene239:106562016, gene27435:106566386, gene30132:106568833, gene32894:106571561, gene34008:106572869, gene35671:106574566, gene37676:106576604, gene42294:106581151, gene46190:106585240, gene4980:106590030, gene4982:106589832, gene5014:106590316, gene5016:106590330, gene6530:106599739, gene7265:106600850	0.00587
195	BP	GO:0001661	conditioned taste aversion	gene11362:106604712, gene43038:106581900, gene989:106602906	0.00599
196	BP	GO:0070389	chaperone cofactor-dependent protein ref...	gene25124:106564265, gene2866:106569712, gene5189:106591679	0.00599
197	BP	GO:0006836	neurotransmitter transport	gene12169:106605517, gene14257:106607467, gene16405:106609517, gene19554:106612708, gene19986:106613013, gene27233:106566182, gene27435:106566386, gene27580:106566494, gene28816:106567683, gene33022:106571856, gene34462:106573329, gene37490:100306766, gene37492:106576408, gene3906:106579373, gene3932:106579570, gene42360:106581096, gene44299:106583079, gene44917:100194771, gene45776:106584498, ge…	0.006
198	BP	GO:0045820	negative regulation of glycolytic proces...	gene15578:106608616, gene18957:106611923, gene21752:100136415, gene38727:106577610, gene44664:100136532	0.00609
199	BP	GO:0070486	leukocyte aggregation	gene10188:106603639, gene10316:106603784, gene10440:106603888, gene12283:106605616, gene14213:106607496, gene14239:106607477, gene15897:106608992, gene20721:106613697, gene21150:106560326, gene21338:106560529, gene21413:106560604, gene22974:106562111, gene22999:106562092, gene2424:106565855, gene25257:106564400, gene26624:106565874, gene2772:106568685, gene28770:106567727, gene2974:106571108, gen…	0.00614
200	BP	GO:0007519	skeletal muscle tissue development	gene10745:106604170, gene10970:106604332, gene11082:106604495, gene11413:106604757, gene11900:100136378, gene13721:106606950, gene13950:106607162, gene14213:106607496, gene16077:106609245, gene18791:106611717, gene19280:106612265, gene19986:106613013, gene22999:106562092, gene23183:106562338, gene23243:106562395, gene27435:106566386, gene28692:106567574, gene30708:106569597, gene34008:106572869, …	0.00625
201	BP	GO:0023061	signal release	gene10970:106604332, gene11900:100136378, gene14213:106607496, gene14257:106607467, gene15601:106608778, gene16405:106609517, gene19554:106612708, gene19986:106613013, gene21752:100136415, gene22400:100136366, gene22776:100136362, gene26770:106565734, gene27233:106566182, gene27435:106566386, gene27572:106566482, gene27580:106566494, gene29145:106567770, gene30144:106568821, gene31433:106570295, …	0.00629
202	BP	GO:0014898	cardiac muscle hypertrophy in response t...	gene12239:100194549, gene14147:106607269, gene22999:106562092, gene44237:106583131, gene48548:106587185, gene48856:106587624	0.00646
203	BP	GO:0044321	response to leptin	gene11900:100136378, gene14213:106607496, gene4157:106582110, gene44423:106583303, gene50210:106588640	0.00663
204	BP	GO:0043619	regulation of transcription from RNA pol...	gene13721:106606950, gene13950:106607162, gene4980:106590030, gene5016:106590330, gene7609:106601241	0.00663
205	BP	GO:0071276	cellular response to cadmium ion	gene19986:106613013, gene27435:106566386, gene34008:106572869, gene4980:106590030, gene5016:106590330	0.00663
206	BP	GO:0070229	negative regulation of lymphocyte apopto...	gene10745:106604170, gene15601:106608778, gene15897:106608992, gene19280:106612265, gene20721:106613697, gene21413:106560604, gene47911:106586664	0.00685
207	BP	GO:0045445	myoblast differentiation	gene13721:106606950, gene13950:106607162, gene13951:106607161, gene18339:106611380, gene21338:106560529, gene21752:100136415, gene23183:106562338, gene24384:106563418, gene44664:100136532, gene46574:106585616, gene51008:106589488, gene57355:106592182, gene7609:106601241	0.00686
208	BP	GO:0050867	positive regulation of cell activation	gene10188:106603639, gene10440:106603888, gene13830:106607028, gene14239:106607477, gene15601:106608778, gene15897:106608992, gene18339:106611380, gene21268:106560450, gene21338:106560529, gene21413:106560604, gene239:106562016, gene2424:106565855, gene26624:106565874, gene28770:106567727, gene29763:100195489, gene31433:106570295, gene32862:100380418, gene32894:106571561, gene35671:106574566, gen…	0.00688
209	BP	GO:0071333	cellular response to glucose stimulus	gene11900:100136378, gene13758:106606996, gene14213:106607496, gene14239:106607477, gene15578:106608616, gene15839:106608947, gene18957:106611923, gene22400:100136366, gene26770:106565734, gene27572:106566482, gene2772:106568685, gene38727:106577610, gene4157:106582110, gene41894:100136356, gene44258:106583111, gene44423:106583303, gene47505:106586264, gene7265:106600850	0.00703
210	BP	GO:0006776	vitamin A metabolic process	gene21752:100136415, gene44664:100136532, gene48544:101448035	0.00715
211	BP	GO:0071332	cellular response to fructose stimulus	gene15578:106608616, gene18957:106611923, gene38727:106577610	0.00715
212	BP	GO:0097411	hypoxia-inducible factor-1alpha signalin...	gene14239:106607477, gene6263:106599137, gene7265:106600850	0.00715
213	BP	GO:0042542	response to hydrogen peroxide	gene13758:106606996, gene15839:106608947, gene18991:106611988, gene19986:106613013, gene20083:106613089, gene20824:106613792, gene2257:106563492, gene25693:106564893, gene27435:106566386, gene29339:106568146, gene30455:106569312, gene34008:106572869, gene35671:106574566, gene37891:106576803, gene4609:106588430, gene4980:106590030, gene5016:106590330, gene52183:106590649, gene6843:100286404, gene9…	0.00716
214	BP	GO:0032354	response to follicle-stimulating hormone	gene15578:106608616, gene15839:106608947, gene18957:106611923, gene37891:106576803, gene38727:106577610	0.00721
215	BP	GO:0002573	myeloid leukocyte differentiation	gene13819:106607038, gene13951:106607161, gene15578:106608616, gene17688:106610738, gene21338:106560529, gene22999:106562092, gene23183:106562338, gene23243:106562395, gene23931:106563105, gene27600:106566511, gene29763:100195489, gene30398:100196464, gene32601:106571544, gene33633:106572480, gene33996:100195428, gene35149:106574039, gene38727:106577610, gene39192:106578083, gene39631:106578540, …	0.00733
216	BP	GO:0010518	positive regulation of phospholipase act...	gene11572:106604929, gene13830:106607028, gene14239:106607477, gene21268:106560450, gene239:106562016, gene2715:106567959, gene30455:106569312, gene34462:106573329, gene39631:106578540, gene42129:106580986, gene45561:106584319, gene7265:106600850, gene8537:106602231	0.00755
217	BP	GO:0045629	negative regulation of T-helper 2 cell d...	gene10316:106603784, gene21413:106560604, gene25257:106564400, gene39714:106578601, gene5437:106594023, gene5613:106595670, gene5627:106595846	0.00768
218	BP	GO:0019933	cAMP-mediated signaling	gene21124:106560302, gene3932:106579570, gene39631:106578540, gene43038:106581900, gene45278:106584037, gene46592:106585604, gene50825:106589334, gene51019:106589495, gene6061:106598526, gene9916:106603240	0.00781
219	BP	GO:0045945	positive regulation of transcription fro...	gene22017:100196378, gene30398:100196464, gene30455:106569312, gene33633:106572480, gene41894:100136356	0.00783
220	BP	GO:0071243	cellular response to arsenic-containing ...	gene10424:106603870, gene45475:106584219, gene45630:106584368, gene4980:106590030, gene5016:106590330	0.00783
221	BP	GO:0048869	cellular developmental process	gene10012:106603555, gene10188:106603639, gene10316:106603784, gene10424:106603870, gene11005:106604396, gene11082:106604495, gene11330:106604686, gene11332:106604687, gene11362:106604712, gene11413:106604757, gene11497:106604868, gene11870:100195869, gene11900:100136378, gene11922:106605285, gene11968:106605330, gene12172:106605519, gene12239:100194549, gene12283:106605616, gene12981:106606328, …	0.00786
222	BP	GO:0014805	smooth muscle adaptation	gene4980:106590030, gene5016:106590330	0.00799
223	BP	GO:0002025	vasodilation by norepinephrine-epinephri...	gene10970:106604332, gene46592:106585604	0.00799
224	BP	GO:0045210	FasL biosynthetic process	gene16678:106609765, gene67027:106597692	0.00799
225	BP	GO:1990089	response to nerve growth factor	gene15601:106608778, gene15839:106608947, gene16375:106609395, gene27730:106566645, gene28380:106567236, gene31433:106570295, gene39631:106578540, gene44299:106583079, gene47505:106586264, gene771:106601178, gene8765:106602328	0.00819
226	BP	GO:0030241	skeletal muscle myosin thick filament as...	gene12239:100194549, gene14147:106607269, gene32862:100380418, gene49260:106588037	0.00841
227	BP	GO:0010738	regulation of protein kinase A signaling	gene23931:106563105, gene29156:106567763, gene43038:106581900, gene45278:106584037	0.00841
228	BP	GO:0010045	response to nickel cation	gene19986:106613013, gene27435:106566386, gene34008:106572869	0.00843
229	BP	GO:0032792	negative regulation of CREB transcriptio...	gene19475:106612460, gene21822:106560921, gene50303:106588784	0.00843
230	BP	GO:0043201	response to leucine	gene15578:106608616, gene18957:106611923, gene38727:106577610	0.00843
231	BP	GO:2000507	positive regulation of energy homeostasi...	gene15578:106608616, gene18957:106611923, gene38727:106577610	0.00843
232	BP	GO:0010656	negative regulation of muscle cell apopt...	gene14239:106607477, gene19986:106613013, gene21338:106560529, gene27435:106566386, gene30455:106569312, gene34008:106572869, gene4980:106590030, gene5016:106590330, gene50210:106588640, gene7265:106600850	0.00845
233	BP	GO:0071398	cellular response to fatty acid	gene14239:106607477, gene15578:106608616, gene18767:106611738, gene18957:106611923, gene21338:106560529, gene239:106562016, gene2772:106568685, gene38727:106577610, gene39631:106578540, gene50210:106588640, gene7265:106600850	0.0088
234	BP	GO:0002028	regulation of sodium ion transport	gene10970:106604332, gene15839:106608947, gene16375:106609395, gene18791:106611717, gene19475:106612460, gene19554:106612708, gene21822:106560921, gene27730:106566645, gene28380:106567236, gene30097:100301980, gene31486:106570356, gene34009:106572868, gene47988:106586777, gene50303:106588784	0.00889
235	BP	GO:0045776	negative regulation of blood pressure	gene10970:106604332, gene11572:106604929, gene21338:106560529, gene21752:100136415, gene239:106562016, gene23931:106563105, gene43593:100136911, gene44664:100136532, gene46592:106585604	0.0089
236	BP	GO:0046697	decidualization	gene13819:106607038, gene15839:106608947, gene21752:100136415, gene44664:100136532, gene7547:100195206, gene9833:100194921	0.00899
237	BP	GO:0002027	regulation of heart rate	gene11572:106604929, gene13721:106606950, gene13950:106607162, gene18791:106611717, gene19554:106612708, gene21338:106560529, gene28033:106566773, gene31433:106570295, gene37579:106576484, gene42916:106581833, gene43038:106581900, gene45278:106584037, gene46592:106585604, gene7609:106601241, gene7771:106601393	0.00906
238	BP	GO:0032370	positive regulation of lipid transport	gene16790:106609880, gene18767:106611738, gene21752:100136415, gene22776:100136362, gene23931:106563105, gene31433:106570295, gene46613:100196040, gene47436:106586206, gene50210:106588640, gene771:106601178	0.00913
239	BP	GO:0043653	mitochondrial fragmentation involved in ...	gene13758:106606996, gene15578:106608616, gene18957:106611923, gene30455:106569312, gene38727:106577610	0.00916
240	BP	GO:0071877	regulation of adrenergic receptor signal...	gene21124:106560302, gene23866:106563080, gene2731:106568345, gene6061:106598526	0.00933
241	BP	GO:0045913	positive regulation of carbohydrate meta...	gene11572:106604929, gene15601:106608778, gene17920:106611031, gene21752:100136415, gene239:106562016, gene2772:106568685, gene35434:106574281, gene38727:106577610, gene42203:106581056, gene44664:100136532, gene47911:106586664, gene771:106601178, gene9442:106602890	0.00939
242	BP	GO:1900373	positive regulation of purine nucleotide...	gene10970:106604332, gene15578:106608616, gene16790:106609880, gene18957:106611923, gene2772:106568685, gene31261:106569878, gene38727:106577610, gene46592:106585604, gene46808:106585411, gene47804:106586587, gene51019:106589495	0.00944
243	BP	GO:0009409	response to cold	gene10389:106603841, gene11362:106604712, gene15578:106608616, gene18957:106611923, gene2359:106564650, gene32862:100380418, gene38727:106577610, gene44237:106583131, gene46592:106585604, gene771:106601178, gene989:106602906	0.00944
244	BP	GO:0001913	T cell mediated cytotoxicity	gene15897:106608992, gene19986:106613013, gene27435:106566386, gene34008:106572869, gene42294:106581151, gene45733:106584265	0.00957
245	BP	GO:0010887	negative regulation of cholesterol stora...	gene16790:106609880, gene21752:100136415, gene44664:100136532	0.00983
246	BP	GO:2001223	negative regulation of neuron migration	gene16063:106609150, gene26770:106565734, gene2781:106568818, gene30455:106569312, gene37138:106576039	0.00989
247	BP	GO:0044849	estrous cycle	gene10970:106604332, gene19986:106613013, gene27435:106566386, gene34008:106572869, gene37891:106576803	0.00989
248	BP	GO:0002763	positive regulation of myeloid leukocyte...	gene15578:106608616, gene23183:106562338, gene23243:106562395, gene27600:106566511, gene38727:106577610, gene39631:106578540, gene50696:106589124, gene6148:106598913, gene989:106602906	0.01002
249	BP	GO:0055091	phospholipid homeostasis	gene16790:106609880, gene21903:106560849, gene34746:106573721, gene6180:100194912	0.0103
250	BP	GO:0070489	T cell aggregation	gene10188:106603639, gene10316:106603784, gene10440:106603888, gene12283:106605616, gene14213:106607496, gene14239:106607477, gene15897:106608992, gene20721:106613697, gene21150:106560326, gene21338:106560529, gene21413:106560604, gene22999:106562092, gene2424:106565855, gene25257:106564400, gene26624:106565874, gene2772:106568685, gene28770:106567727, gene2974:106571108, gene29763:100195489, gen…	0.01033
251	BP	GO:0042110	T cell activation	gene10188:106603639, gene10316:106603784, gene10440:106603888, gene12283:106605616, gene14213:106607496, gene14239:106607477, gene15897:106608992, gene20721:106613697, gene21150:106560326, gene21338:106560529, gene21413:106560604, gene22999:106562092, gene2424:106565855, gene25257:106564400, gene26624:106565874, gene2772:106568685, gene28770:106567727, gene2974:106571108, gene29763:100195489, gen…	0.01033
252	BP	GO:0001708	cell fate specification	gene16164:106609323, gene19148:106612139, gene23290:106562437, gene23837:106562982, gene25538:106564658, gene2715:106567959, gene29556:106568488, gene33738:106572630, gene34283:106573116, gene34462:106573329, gene4053:106581253, gene41894:100136356, gene42916:106581833, gene46574:106585616, gene46613:100196040, gene47:106579027, gene497:106589077, gene6148:106598913	0.01081
253	BP	GO:0007269	neurotransmitter secretion	gene14257:106607467, gene16405:106609517, gene19554:106612708, gene19986:106613013, gene27233:106566182, gene27435:106566386, gene27580:106566494, gene33022:106571856, gene34462:106573329, gene37490:100306766, gene37492:106576408, gene3932:106579570, gene44299:106583079, gene44917:100194771, gene45776:106584498, gene46444:106585038, gene46456:106585027, gene46613:100196040, gene47505:106586264, g…	0.01095
254	BP	GO:0072363	regulation of glycolytic process by posi...	gene21752:100136415, gene44664:100136532	0.01101
255	BP	GO:0046878	positive regulation of saliva secretion	gene31433:106570295, gene46592:106585604	0.01101
256	CC	GO:0044459	plasma membrane part	gene10970:106604332, gene11082:106604495, gene11330:106604686, gene11497:106604868, gene11572:106604929, gene12163:106605512, gene12169:106605517, gene13298:106606647, gene13469:106606823, gene14257:106607467, gene1426:106609185, gene15601:106608778, gene15839:106608947, gene16063:106609150, gene16164:106609323, gene16405:106609517, gene16406:106609518, gene16790:106609880, gene16874:106609958, g…	0.0014
257	CC	GO:1990124	messenger ribonucleoprotein complex	gene10424:106603870, gene19986:106613013, gene27435:106566386, gene34008:106572869, gene45475:106584219	0.0026
258	CC	GO:0001917	photoreceptor inner segment	gene19986:106613013, gene22624:106561786, gene26964:106566029, gene27435:106566386, gene34008:106572869, gene51876:106590329, gene5702:106596460, gene7946:106601574	0.0033
259	CC	GO:0042995	cell projection	gene10012:106603555, gene10424:106603870, gene10970:106604332, gene11082:106604495, gene11497:106604868, gene11900:100136378, gene12169:106605517, gene12172:106605519, gene13747:106606974, gene13758:106606996, gene14213:106607496, gene14239:106607477, gene14257:106607467, gene15553:106608638, gene15578:106608616, gene15601:106608778, gene16063:106609150, gene16375:106609395, gene16405:106609517, …	0.0048
260	CC	GO:0097440	apical dendrite	gene10424:106603870, gene15578:106608616, gene18957:106611923, gene25498:106564692, gene38727:106577610, gene45475:106584219	0.0048
261	CC	GO:0045254	pyruvate dehydrogenase complex	gene10130:106603456, gene14239:106607477, gene7265:106600850	0.0068
262	CC	GO:0005887	integral component of plasma membrane	gene10970:106604332, gene11082:106604495, gene11330:106604686, gene11497:106604868, gene11572:106604929, gene12169:106605517, gene13298:106606647, gene14257:106607467, gene1426:106609185, gene15601:106608778, gene16405:106609517, gene16406:106609518, gene16790:106609880, gene16874:106609958, gene18767:106611738, gene21390:106560584, gene22911:106562160, gene239:106562016, gene24384:106563418, gen…	0.0074
263	CC	GO:0002199	zona pellucida receptor complex	gene27435:106566386, gene34008:106572869, gene7385:106601018	0.008
264	CC	GO:0000791	euchromatin	gene13819:106607038, gene15578:106608616, gene18957:106611923, gene25693:106564893, gene38727:106577610, gene39357:106578255, gene39631:106578540, gene40305:106579217, gene4609:106588430	0.009
265	CC	GO:0035189	Rb-E2F complex	gene23183:106562338, gene23243:106562395, gene30398:100196464	0.0094
266	CC	GO:0001533	cornified envelope	gene13787:106607014, gene26813:106565964, gene43968:106582810, gene7771:106601393	0.0097
267	CC	GO:0031332	RNAi effector complex	gene12172:106605519, gene3903:106579350, gene49703:100380831, gene6892:106600575	0.0117
268	CC	GO:0016442	RISC complex	gene12172:106605519, gene3903:106579350, gene49703:100380831, gene6892:106600575	0.0117
269	CC	GO:0016323	basolateral plasma membrane	gene11082:106604495, gene14257:106607467, gene18767:106611738, gene21390:106560584, gene22400:100136366, gene22974:106562111, gene23207:100136926, gene25135:106564279, gene28327:106567194, gene28816:106567683, gene29582:106568503, gene2979:100136908, gene30455:106569312, gene32862:100380418, gene35582:106574544, gene38905:106577803, gene42294:106581151, gene42360:106581096, gene43271:106582091, g…	0.0133
270	CC	GO:0005719	nuclear euchromatin	gene13819:106607038, gene15578:106608616, gene18957:106611923, gene38727:106577610, gene39357:106578255, gene39631:106578540, gene40305:106579217	0.0136
271	CC	GO:0031232	extrinsic component of external side of ...	gene15839:106608947, gene21390:106560584	0.0177
272	CC	GO:0034752	cytosolic aryl hydrocarbon receptor comp...	gene43593:100136911, gene51815:106590294	0.0177
273	CC	GO:0034753	nuclear aryl hydrocarbon receptor comple...	gene43593:100136911, gene51815:106590294	0.0177
274	CC	GO:0036488	CHOP-C/EBP complex	gene30398:100196464, gene33633:106572480	0.0177
275	CC	GO:0070435	Shc-EGFR complex	gene20824:106613792, gene30455:106569312	0.0217
276	CC	GO:0005922	connexon complex	gene18134:106611221, gene20083:106613089, gene9833:100194921	0.0246
277	CC	GO:0008180	COP9 signalosome	gene27435:106566386, gene34008:106572869, gene42129:106580986, gene42253:106581181, gene7092:106600736, gene7385:106601018, gene8537:106602231	0.0269
278	CC	GO:0034364	high-density lipoprotein particle	gene16790:106609880, gene21903:106560849, gene34746:106573721	0.0271
279	CC	GO:0060198	clathrin-sculpted vesicle	gene19986:106613013, gene27435:106566386, gene46456:106585027, gene48247:106587027	0.0293
280	CC	GO:0072562	blood microparticle	gene19986:106613013, gene21390:106560584, gene27435:106566386, gene34008:106572869, gene43271:106582091, gene6180:100194912, gene7092:106600736, gene7385:106601018, gene9905:106603367	0.0307
281	CC	GO:0005882	intermediate filament	gene19986:106613013, gene25476:106564629, gene27435:106566386, gene34008:106572869, gene4685:106587804, gene4692:106586538, gene7771:106601393, gene7946:106601574	0.0309
282	CC	GO:0009705	plant-type vacuole membrane	gene320:106570052, gene725:106601609	0.0309
283	CC	GO:0005967	mitochondrial pyruvate dehydrogenase com...	gene14239:106607477, gene7265:106600850	0.0309
284	CC	GO:0034751	aryl hydrocarbon receptor complex	gene43593:100136911, gene51815:106590294	0.0309
285	CC	GO:0005921	gap junction	gene18134:106611221, gene20083:106613089, gene47054:106585805, gene9833:100194921	0.0313
286	CC	GO:0044441	ciliary part	gene12172:106605519, gene14257:106607467, gene15553:106608638, gene15601:106608778, gene16790:106609880, gene19554:106612708, gene25135:106564279, gene25462:106564614, gene26601:100380445, gene26964:106566029, gene27167:106566109, gene42253:106581181, gene4714:106587516, gene47680:106586448, gene50303:106588784, gene51876:106590329, gene5702:106596460, gene64439:106591988, gene6513:106599713, gen…	0.0321
287	CC	GO:0031513	nonmotile primary cilium	gene16790:106609880, gene16874:106609958, gene19554:106612708, gene22624:106561786, gene24057:106563294, gene26601:100380445, gene26964:106566029, gene27731:100136370, gene51876:106590329, gene5702:106596460, gene64439:106591988, gene7946:106601574, gene9627:106603182	0.034
288	CC	GO:0044456	synapse part	gene10424:106603870, gene10970:106604332, gene11900:100136378, gene12163:106605512, gene14213:106607496, gene14239:106607477, gene14257:106607467, gene16063:106609150, gene16375:106609395, gene18791:106611717, gene19554:106612708, gene19986:106613013, gene21885:106560864, gene24198:106563184, gene25498:106564692, gene27435:106566386, gene27730:106566645, gene27776:106566761, gene2781:106568818, g…	0.035
289	CC	GO:0001750	photoreceptor outer segment	gene16790:106609880, gene19554:106612708, gene22624:106561786, gene26601:100380445, gene26964:106566029, gene27731:100136370, gene51876:106590329, gene5702:106596460, gene7946:106601574	0.0365
290	CC	GO:0016324	apical plasma membrane	gene12169:106605517, gene16790:106609880, gene18767:106611738, gene19554:106612708, gene21390:106560584, gene22400:100136366, gene22974:106562111, gene25538:106564658, gene28816:106567683, gene2979:100136908, gene30455:106569312, gene32862:100380418, gene34009:106572868, gene35671:106574566, gene3906:106579373, gene42360:106581096, gene43271:106582091, gene4384:106584098, gene44299:106583079, gen…	0.0388
291	CC	GO:0005929	cilium	gene12172:106605519, gene14257:106607467, gene15553:106608638, gene15601:106608778, gene16790:106609880, gene16874:106609958, gene19306:106612291, gene19554:106612708, gene22624:106561786, gene24057:106563294, gene25135:106564279, gene25462:106564614, gene26601:100380445, gene26964:106566029, gene27167:106566109, gene27731:100136370, gene42129:106580986, gene42253:106581181, gene45278:106584037, …	0.0397
292	CC	GO:0098590	plasma membrane region	gene10970:106604332, gene11082:106604495, gene12163:106605512, gene12169:106605517, gene14257:106607467, gene15601:106608778, gene16063:106609150, gene16790:106609880, gene18767:106611738, gene18791:106611717, gene19554:106612708, gene21390:106560584, gene21885:106560864, gene22400:100136366, gene22974:106562111, gene23207:100136926, gene24289:106563501, gene25135:106564279, gene25498:106564692, …	0.0402
293	CC	GO:0000325	plant-type vacuole	gene320:106570052, gene725:106601609	0.0413
294	CC	GO:0072372	primary cilium	gene16790:106609880, gene16874:106609958, gene19554:106612708, gene22624:106561786, gene24057:106563294, gene25135:106564279, gene26601:100380445, gene26964:106566029, gene27731:100136370, gene42253:106581181, gene45278:106584037, gene51876:106590329, gene5702:106596460, gene64439:106591988, gene7946:106601574, gene8537:106602231, gene9627:106603182	0.0429
295	CC	GO:0044463	cell projection part	gene10424:106603870, gene10970:106604332, gene11082:106604495, gene11900:100136378, gene12169:106605517, gene12172:106605519, gene14213:106607496, gene14239:106607477, gene14257:106607467, gene15553:106608638, gene15601:106608778, gene16063:106609150, gene16790:106609880, gene18791:106611717, gene19299:106612280, gene19554:106612708, gene19986:106613013, gene22229:106561399, gene23207:100136926, …	0.0479
296	CC	GO:0005903	brush border	gene12169:106605517, gene16405:106609517, gene32862:100380418, gene35671:106574566, gene37490:100306766, gene37492:106576408, gene3906:106579373, gene43251:106582107, gene43983:106582826, gene47436:106586206, gene47866:106586629, gene7771:106601393, gene7946:106601574, gene8765:106602328	0.0489
297	CC	GO:0044297	cell body	gene10424:106603870, gene10970:106604332, gene11497:106604868, gene15578:106608616, gene15839:106608947, gene16405:106609517, gene18047:106611136, gene18791:106611717, gene18957:106611923, gene19122:106612116, gene19299:106612280, gene19554:106612708, gene19846:106612856, gene19986:106613013, gene20064:106612954, gene22624:106561786, gene23835:106562980, gene25498:106564692, gene27167:106566109, …	0.0492

## Sheet: T5_SPLL_GO
X1	Category	ID	Term	Genes	adj_pval
1	MF	GO:0020037	heme binding	gene23207:100136926, gene37891:106576803, gene48784:100136916, gene4980:106590030, gene5016:106590330, gene7293:106600825	1.1e-05
2	MF	GO:0070379	high mobility group box 1 binding	gene15093:106608273, gene497:106589077	9.1e-05
3	MF	GO:0070330	aromatase activity	gene23207:100136926, gene48784:100136916	0.00049
4	MF	GO:0004630	phospholipase D activity	gene4980:106590030, gene5016:106590330	0.00093
5	MF	GO:1990239	steroid hormone binding	gene17434:106610479, gene8520:106602157	0.00107
6	MF	GO:0005537	mannose binding	gene2525:106566875, gene75715:106591358	0.00185
7	MF	GO:0000982	transcription factor activity, RNA polym...	gene10457:106603906, gene15093:106608273, gene16077:106609245, gene22129:106561315, gene28553:106567483, gene39631:106578540, gene44237:106583131, gene497:106589077, gene7293:106600825	0.00313
8	MF	GO:0048029	monosaccharide binding	gene2525:106566875, gene32894:106571561, gene4714:106587516, gene75715:106591358, gene816:106601984	0.00387
9	MF	GO:0005391	sodium:potassium-exchanging ATPase activ...	gene17434:106610479, gene8520:106602157	0.00427
10	MF	GO:0042802	identical protein binding	gene1470:106609366, gene15093:106608273, gene16077:106609245, gene18047:106611136, gene20083:106613089, gene22129:106561315, gene2525:106566875, gene31223:106569924, gene32862:100380418, gene38656:100136445, gene41046:106580130, gene41906:106580757, gene42253:106581181, gene42294:106581151, gene43813:106582660, gene4714:106587516, gene497:106589077, gene4980:106590030, gene5016:106590330, gene726…	0.00432
11	MF	GO:0031402	sodium ion binding	gene17434:106610479, gene18339:106611380	0.00453
12	MF	GO:0030165	PDZ domain binding	gene14257:106607467, gene15093:106608273, gene40618:106579507, gene42294:106581151, gene497:106589077	0.005
13	MF	GO:0017110	nucleoside-diphosphatase activity	gene17920:106611031, gene37505:106576398	0.00726
14	MF	GO:0016705	oxidoreductase activity, acting on paire...	gene23207:100136926, gene37891:106576803, gene48784:100136916, gene4980:106590030, gene5016:106590330, gene816:106601984	0.00744
15	MF	GO:0030235	nitric-oxide synthase regulator activity	gene32862:100380418, gene42253:106581181	0.01138
16	MF	GO:0016831	carboxy-lyase activity	gene18047:106611136, gene61616:106594092	0.01264
17	MF	GO:0019825	oxygen binding	gene37891:106576803, gene816:106601984	0.01397
18	MF	GO:0001228	transcriptional activator activity, RNA ...	gene10457:106603906, gene15093:106608273, gene28553:106567483, gene39631:106578540, gene44237:106583131, gene497:106589077, gene6530:106599739	0.01728
19	MF	GO:0002135	CTP binding	gene32862:100380418	0.01811
20	MF	GO:0017111	nucleoside-triphosphatase activity	gene17434:106610479, gene17920:106611031, gene22434:106561595, gene24057:106563294, gene24198:106563184, gene32862:100380418, gene37505:106576398, gene42253:106581181, gene45874:106584584, gene46456:106585027, gene4714:106587516, gene8520:106602157	0.01978
21	MF	GO:0008134	transcription factor binding	gene10457:106603906, gene10745:106604170, gene13954:106607159, gene15093:106608273, gene22129:106561315, gene38727:106577610, gene39631:106578540, gene44237:106583131, gene497:106589077, gene7293:106600825, gene7605:100194913	0.02018
22	MF	GO:0005506	iron ion binding	gene23207:100136926, gene48784:100136916, gene816:106601984	0.02027
23	MF	GO:0008519	ammonium transmembrane transporter activ...	gene18047:106611136, gene27580:106566494	0.02034
24	MF	GO:0005112	Notch binding	gene15093:106608273, gene497:106589077	0.02034
25	MF	GO:0042979	ornithine decarboxylase regulator activi...	gene18047:106611136	0.0211
26	MF	GO:0004382	guanosine-diphosphatase activity	gene17920:106611031	0.0211
27	MF	GO:0042806	fucose binding	gene75715:106591358	0.0211
28	MF	GO:0052840	inositol diphosphate tetrakisphosphate d...	gene37505:106576398	0.0211
29	MF	GO:0052841	inositol bisdiphosphate tetrakisphosphat...	gene37505:106576398	0.0211
30	MF	GO:0052842	inositol diphosphate pentakisphosphate d...	gene37505:106576398	0.0211
31	MF	GO:0052843	inositol-1-diphosphate-2,3,4,5,6-pentaki...	gene37505:106576398	0.0211
32	MF	GO:0052844	inositol-3-diphosphate-1,2,4,5,6-pentaki...	gene37505:106576398	0.0211
33	MF	GO:0052845	inositol-5-diphosphate-1,2,3,4,6-pentaki...	gene37505:106576398	0.0211
34	MF	GO:0052846	inositol-1,5-bisdiphosphate-2,3,4,6-tetr...	gene37505:106576398	0.0211
35	MF	GO:0052847	inositol-1,5-bisdiphosphate-2,3,4,6-tetr...	gene37505:106576398	0.0211
36	MF	GO:0052848	inositol-3,5-bisdiphosphate-2,3,4,6-tetr...	gene37505:106576398	0.0211
37	MF	GO:0008486	diphosphoinositol-polyphosphate diphosph...	gene37505:106576398	0.0211
38	MF	GO:0001077	transcriptional activator activity, RNA ...	gene10457:106603906, gene15093:106608273, gene28553:106567483, gene39631:106578540, gene44237:106583131, gene497:106589077	0.02284
39	MF	GO:0008092	cytoskeletal protein binding	gene11499:106604864, gene17434:106610479, gene18339:106611380, gene22434:106561595, gene24057:106563294, gene30144:106568821, gene31223:106569924, gene33543:106572414, gene38727:106577610, gene41906:106580757, gene42253:106581181, gene46456:106585027, gene6061:106598526	0.02335
40	MF	GO:0019899	enzyme binding	gene10457:106603906, gene11499:106604864, gene13954:106607159, gene14257:106607467, gene17434:106610479, gene24198:106563184, gene30144:106568821, gene32862:100380418, gene32894:106571561, gene33543:106572414, gene37891:106576803, gene38656:100136445, gene38727:106577610, gene39631:106578540, gene42253:106581181, gene43813:106582660, gene44237:106583131, gene46456:106585027, gene4980:106590030, g…	0.02384
41	MF	GO:0008865	fructokinase activity	gene4714:106587516	0.02408
42	MF	GO:0055056	D-glucose transmembrane transporter acti...	gene38656:100136445	0.02408
43	MF	GO:0019158	mannokinase activity	gene4714:106587516	0.02408
44	MF	GO:0032564	dATP binding	gene32862:100380418	0.02408
45	MF	GO:0032558	adenyl deoxyribonucleotide binding	gene32862:100380418	0.02408
46	MF	GO:0004740	pyruvate dehydrogenase (acetyl-transferr...	gene7265:106600850	0.02408
47	MF	GO:0016830	carbon-carbon lyase activity	gene18047:106611136, gene61616:106594092	0.02476
48	MF	GO:0017098	sulfonylurea receptor binding	gene32862:100380418	0.02705
49	MF	GO:0004340	glucokinase activity	gene4714:106587516	0.02705
50	MF	GO:1990050	phosphatidic acid transporter activity	gene27168:106566111	0.02705
51	MF	GO:0004396	hexokinase activity	gene4714:106587516	0.02705
52	MF	GO:0033300	dehydroascorbic acid transporter activit...	gene38656:100136445	0.03001
53	MF	GO:0019826	oxygen sensor activity	gene816:106601984	0.03001
54	MF	GO:0002134	UTP binding	gene32862:100380418	0.03001
55	MF	GO:0032551	pyrimidine ribonucleoside binding	gene32862:100380418	0.03001
56	MF	GO:0032554	purine deoxyribonucleotide binding	gene32862:100380418	0.03001
57	MF	GO:0036218	dTTP diphosphatase activity	gene37505:106576398	0.03591
58	MF	GO:0045134	uridine-diphosphatase activity	gene17920:106611031	0.03591
59	MF	GO:0008828	dATP pyrophosphohydrolase activity	gene37505:106576398	0.03591
60	MF	GO:0044606	phosphocholine hydrolase activity	gene37505:106576398	0.03591
61	MF	GO:0019176	dihydroneopterin monophosphate phosphata...	gene37505:106576398	0.03591
62	MF	GO:0004787	thiamine-pyrophosphatase activity	gene37505:106576398	0.03591
63	MF	GO:0008758	UDP-2,3-diacylglucosamine hydrolase acti...	gene37505:106576398	0.03591
64	MF	GO:0032557	pyrimidine ribonucleotide binding	gene32862:100380418	0.03591
65	MF	GO:0019144	ADP-sugar diphosphatase activity	gene37505:106576398	0.03591
66	MF	GO:0031545	peptidyl-proline 4-dioxygenase activity	gene816:106601984	0.03591
67	MF	GO:0004351	glutamate decarboxylase activity	gene61616:106594092	0.03884
68	MF	GO:0001884	pyrimidine nucleoside binding	gene32862:100380418	0.03884
69	MF	GO:0008796	bis(5'-nucleosyl)-tetraphosphatase activ...	gene37505:106576398	0.03884
70	MF	GO:0051959	dynein light intermediate chain binding	gene42253:106581181	0.03884
71	MF	GO:0019177	dihydroneopterin triphosphate pyrophosph...	gene37505:106576398	0.03884
72	MF	GO:0032552	deoxyribonucleotide binding	gene32862:100380418	0.03884
73	MF	GO:0036222	XTP diphosphatase activity	gene37505:106576398	0.03884
74	MF	GO:0051117	ATPase binding	gene17434:106610479, gene24198:106563184, gene46456:106585027	0.03918
75	MF	GO:0016887	ATPase activity	gene17434:106610479, gene22434:106561595, gene24198:106563184, gene32862:100380418, gene37505:106576398, gene42253:106581181, gene4714:106587516, gene8520:106602157	0.04026
76	MF	GO:0042803	protein homodimerization activity	gene16077:106609245, gene18047:106611136, gene22129:106561315, gene32862:100380418, gene42253:106581181, gene42294:106581151, gene43813:106582660, gene4714:106587516, gene4980:106590030, gene5016:106590330, gene7265:106600850	0.04148
77	MF	GO:0035870	dITP diphosphatase activity	gene37505:106576398	0.04177
78	MF	GO:0015220	choline transmembrane transporter activi...	gene27580:106566494	0.04177
79	MF	GO:0004676	3-phosphoinositide-dependent protein kin...	gene7265:106600850	0.04177
80	MF	GO:0016679	oxidoreductase activity, acting on diphe...	gene37891:106576803	0.04177
81	MF	GO:0008413	8-oxo-7,8-dihydroguanosine triphosphate ...	gene37505:106576398	0.04177
82	MF	GO:0016712	oxidoreductase activity, acting on paire...	gene23207:100136926, gene37891:106576803, gene48784:100136916	0.04352
83	MF	GO:0000977	RNA polymerase II regulatory region sequ...	gene10457:106603906, gene15093:106608273, gene16077:106609245, gene22129:106561315, gene28553:106567483, gene39631:106578540, gene497:106589077, gene6530:106599739, gene7293:106600825	0.04364
84	MF	GO:0005516	calmodulin binding	gene43924:106582757, gene44237:106583131, gene50338:106588753, gene6061:106598526	0.04424
85	MF	GO:0050682	AF-2 domain binding	gene38727:106577610	0.04468
86	MF	GO:0042910	xenobiotic transporter activity	gene38656:100136445	0.04759
87	MF	GO:0005332	gamma-aminobutyric acid:sodium symporter...	gene27580:106566494	0.04759
88	MF	GO:0015185	gamma-aminobutyric acid transmembrane tr...	gene27580:106566494	0.04759
89	MF	GO:0031418	L-ascorbic acid binding	gene816:106601984	0.04759
90	MF	GO:0001012	RNA polymerase II regulatory region DNA ...	gene10457:106603906, gene15093:106608273, gene16077:106609245, gene22129:106561315, gene28553:106567483, gene39631:106578540, gene497:106589077, gene6530:106599739, gene7293:106600825	0.04783
91	MF	GO:0004683	calmodulin-dependent protein kinase acti...	gene14257:106607467, gene43924:106582757	0.048
92	MF	GO:0003705	transcription factor activity, RNA polym...	gene15093:106608273, gene39631:106578540, gene497:106589077, gene6530:106599739	0.04803
93	BP	GO:0043305	negative regulation of mast cell degranu...	gene4980:106590030, gene5016:106590330, gene6530:106599739	7.2e-05
94	BP	GO:0014805	smooth muscle adaptation	gene4980:106590030, gene5016:106590330	0.00014
95	BP	GO:0030720	oocyte localization involved in germariu...	gene15093:106608273, gene497:106589077	0.00014
96	BP	GO:0045080	positive regulation of chemokine biosynt...	gene4980:106590030, gene5016:106590330	0.0002
97	BP	GO:0060579	ventral spinal cord interneuron fate com...	gene15093:106608273, gene22129:106561315, gene497:106589077	0.00021
98	BP	GO:0048264	determination of ventral identity	gene15093:106608273, gene28553:106567483, gene497:106589077	0.00025
99	BP	GO:0014900	muscle hyperplasia	gene4980:106590030, gene5016:106590330	0.00027
100	BP	GO:0034395	regulation of transcription from RNA pol...	gene4980:106590030, gene5016:106590330	0.00027
101	BP	GO:1903588	negative regulation of blood vessel endo...	gene15093:106608273, gene497:106589077	0.00034
102	BP	GO:0006964	positive regulation of biosynthetic proc...	gene15093:106608273, gene497:106589077	0.00034
103	BP	GO:0042167	heme catabolic process	gene4980:106590030, gene5016:106590330	0.00043
104	BP	GO:0032764	negative regulation of mast cell cytokin...	gene4980:106590030, gene5016:106590330	0.00052
105	BP	GO:0071456	cellular response to hypoxia	gene10457:106603906, gene38656:100136445, gene38727:106577610, gene4980:106590030, gene5016:106590330, gene7265:106600850, gene816:106601984	0.00061
106	BP	GO:0048728	proboscis development	gene15093:106608273, gene497:106589077	0.00062
107	BP	GO:0051591	response to cAMP	gene10457:106603906, gene14257:106607467, gene30144:106568821, gene37891:106576803, gene38727:106577610, gene39631:106578540	0.00065
108	BP	GO:0007479	leg disc proximal/distal pattern formati...	gene15093:106608273, gene497:106589077	0.00073
109	BP	GO:0016330	second mitotic wave involved in compound...	gene15093:106608273, gene497:106589077	0.00073
110	BP	GO:0042387	plasmatocyte differentiation	gene15093:106608273, gene497:106589077	0.00086
111	BP	GO:0008407	chaeta morphogenesis	gene15093:106608273, gene42253:106581181, gene497:106589077	0.00093
112	BP	GO:0002246	wound healing involved in inflammatory r...	gene4980:106590030, gene5016:106590330	0.00099
113	BP	GO:0021523	somatic motor neuron differentiation	gene15093:106608273, gene497:106589077	0.00112
114	BP	GO:2000377	regulation of reactive oxygen species me...	gene14257:106607467, gene32862:100380418, gene37891:106576803, gene42253:106581181, gene45383:106584172, gene4714:106587516, gene7265:106600850	0.00127
115	BP	GO:1903416	response to glycoside	gene17434:106610479, gene8520:106602157	0.00143
116	BP	GO:0035912	dorsal aorta morphogenesis	gene15093:106608273, gene497:106589077	0.00143
117	BP	GO:0060034	notochord cell differentiation	gene15093:106608273, gene497:106589077	0.00159
118	BP	GO:0072554	blood vessel lumenization	gene15093:106608273, gene497:106589077	0.00159
119	BP	GO:0036376	sodium ion export from cell	gene17434:106610479, gene8520:106602157	0.00159
120	BP	GO:0055016	hypochord development	gene15093:106608273, gene497:106589077	0.00159
121	BP	GO:0000302	response to reactive oxygen species	gene20083:106613089, gene30144:106568821, gene37891:106576803, gene38727:106577610, gene4980:106590030, gene5016:106590330, gene7265:106600850, gene816:106601984	0.00193
122	BP	GO:0045608	negative regulation of auditory receptor...	gene15093:106608273, gene497:106589077	0.00195
123	BP	GO:0007475	apposition of dorsal and ventral imagina...	gene15093:106608273, gene497:106589077	0.00214
124	BP	GO:0035469	determination of pancreatic left/right a...	gene15093:106608273, gene497:106589077	0.00214
125	BP	GO:0061056	sclerotome development	gene15093:106608273, gene497:106589077	0.00214
126	BP	GO:0060842	arterial endothelial cell differentiatio...	gene15093:106608273, gene497:106589077	0.00234
127	BP	GO:0071910	determination of liver left/right asymme...	gene15093:106608273, gene497:106589077	0.00234
128	BP	GO:0032693	negative regulation of interleukin-10 pr...	gene15093:106608273, gene497:106589077	0.00254
129	BP	GO:0048662	negative regulation of smooth muscle cel...	gene38727:106577610, gene4980:106590030, gene5016:106590330	0.00266
130	BP	GO:0001757	somite specification	gene15093:106608273, gene497:106589077	0.00276
131	BP	GO:0031947	negative regulation of glucocorticoid bi...	gene17434:106610479, gene8520:106602157	0.00276
132	BP	GO:0021536	diencephalon development	gene15093:106608273, gene22129:106561315, gene39631:106578540, gene43926:106582759, gene497:106589077	0.00291
133	BP	GO:0048800	antennal morphogenesis	gene15093:106608273, gene497:106589077	0.00298
134	BP	GO:0061074	regulation of neural retina development	gene15093:106608273, gene497:106589077	0.00298
135	BP	GO:0071873	response to norepinephrine	gene10457:106603906, gene38727:106577610	0.00321
136	BP	GO:0003222	ventricular trabecula myocardium morphog...	gene15093:106608273, gene497:106589077	0.00321
137	BP	GO:0045465	R8 cell differentiation	gene15093:106608273, gene497:106589077	0.00345
138	BP	GO:0003344	pericardium morphogenesis	gene15093:106608273, gene497:106589077	0.0037
139	BP	GO:0007298	border follicle cell migration	gene14257:106607467, gene15093:106608273, gene497:106589077	0.00403
140	BP	GO:0048190	wing disc dorsal/ventral pattern formati...	gene15093:106608273, gene497:106589077	0.00422
141	BP	GO:0090051	negative regulation of cell migration in...	gene15093:106608273, gene497:106589077	0.00422
142	BP	GO:0030007	cellular potassium ion homeostasis	gene17434:106610479, gene8520:106602157	0.00422
143	BP	GO:0045989	positive regulation of striated muscle c...	gene17434:106610479, gene32862:100380418, gene6061:106598526, gene8520:106602157	0.00428
144	BP	GO:0007386	compartment pattern specification	gene15093:106608273, gene497:106589077	0.0045
145	BP	GO:0046685	response to arsenic-containing substance	gene37891:106576803, gene4980:106590030, gene5016:106590330	0.00485
146	BP	GO:0043618	regulation of transcription from RNA pol...	gene10457:106603906, gene4980:106590030, gene5016:106590330, gene816:106601984	0.00487
147	BP	GO:0048545	response to steroid hormone	gene10457:106603906, gene17434:106610479, gene30144:106568821, gene32862:100380418, gene37891:106576803, gene38656:100136445, gene38727:106577610, gene4980:106590030, gene5016:106590330, gene7293:106600825, gene816:106601984, gene8520:106602157	0.0051
148	BP	GO:0007398	ectoderm development	gene15093:106608273, gene28553:106567483, gene497:106589077	0.00523
149	BP	GO:0061314	Notch signaling involved in heart develo...	gene15093:106608273, gene497:106589077	0.00536
150	BP	GO:0030713	ovarian follicle cell stalk formation	gene15093:106608273, gene497:106589077	0.00567
151	BP	GO:0016319	mushroom body development	gene15093:106608273, gene497:106589077	0.00598
152	BP	GO:0035215	genital disc development	gene15093:106608273, gene497:106589077	0.00598
153	BP	GO:0002685	regulation of leukocyte migration	gene32894:106571561, gene40600:106579494, gene43924:106582757, gene4980:106590030, gene5016:106590330	0.00613
154	BP	GO:0019932	second-messenger-mediated signaling	gene13954:106607159, gene30144:106568821, gene37505:106576398, gene39631:106578540, gene6061:106598526, gene7265:106600850, gene7605:100194913	0.00623
155	BP	GO:0099515	actin filament-based transport	gene41046:106580130, gene41906:106580757	0.0063
156	BP	GO:0050873	brown fat cell differentiation	gene38656:100136445, gene38727:106577610, gene6061:106598526	0.00633
157	BP	GO:0070986	left/right axis specification	gene15093:106608273, gene497:106589077	0.00662
158	BP	GO:0009812	flavonoid metabolic process	gene37891:106576803, gene38727:106577610	0.00662
159	BP	GO:0007274	neuromuscular synaptic transmission	gene10457:106603906, gene14257:106607467, gene46456:106585027	0.00678
160	BP	GO:0048771	tissue remodeling	gene15093:106608273, gene18339:106611380, gene38727:106577610, gene43926:106582759, gene497:106589077, gene7265:106600850	0.00686
161	BP	GO:0003140	determination of left/right asymmetry in...	gene15093:106608273, gene497:106589077	0.0073
162	BP	GO:0071372	cellular response to follicle-stimulatin...	gene10457:106603906, gene38727:106577610	0.00765
163	BP	GO:0043523	regulation of neuron apoptotic process	gene10457:106603906, gene22129:106561315, gene38727:106577610, gene43813:106582660, gene4980:106590030, gene5016:106590330, gene816:106601984	0.00771
164	BP	GO:0010657	muscle cell apoptotic process	gene32862:100380418, gene4980:106590030, gene5016:106590330, gene7265:106600850	0.00806
165	BP	GO:0019752	carboxylic acid metabolic process	gene17920:106611031, gene18047:106611136, gene27580:106566494, gene37891:106576803, gene38656:100136445, gene38727:106577610, gene39631:106578540, gene42253:106581181, gene4714:106587516, gene61616:106594092, gene7265:106600850, gene7293:106600825, gene816:106601984	0.00855
166	BP	GO:2000179	positive regulation of neural precursor ...	gene15093:106608273, gene22129:106561315, gene497:106589077	0.00857
167	BP	GO:0006883	cellular sodium ion homeostasis	gene17434:106610479, gene8520:106602157	0.00874
168	BP	GO:0036011	imaginal disc-derived leg segmentation	gene15093:106608273, gene497:106589077	0.00874
169	BP	GO:0061549	sympathetic ganglion development	gene22129:106561315, gene43926:106582759	0.00874
170	BP	GO:0035094	response to nicotine	gene39631:106578540, gene4980:106590030, gene5016:106590330	0.00911
171	BP	GO:0021553	olfactory nerve development	gene15093:106608273, gene497:106589077	0.00912
172	BP	GO:0090280	positive regulation of calcium ion impor...	gene14257:106607467, gene18339:106611380, gene7265:106600850	0.00929
173	BP	GO:0030811	regulation of nucleotide catabolic proce...	gene17920:106611031, gene38727:106577610, gene816:106601984	0.00947
174	BP	GO:0033504	floor plate development	gene15093:106608273, gene497:106589077	0.00951
175	BP	GO:0060452	positive regulation of cardiac muscle co...	gene32862:100380418, gene6061:106598526	0.00951
176	BP	GO:0046031	ADP metabolic process	gene17920:106611031, gene37505:106576398, gene38727:106577610, gene4714:106587516	0.01007
177	BP	GO:0006111	regulation of gluconeogenesis	gene38727:106577610, gene7265:106600850, gene7293:106600825	0.01042
178	BP	GO:0071276	cellular response to cadmium ion	gene4980:106590030, gene5016:106590330	0.01071
179	BP	GO:0010107	potassium ion import	gene17434:106610479, gene8520:106602157	0.01071
180	BP	GO:0043619	regulation of transcription from RNA pol...	gene4980:106590030, gene5016:106590330	0.01071
181	BP	GO:0046331	lateral inhibition	gene14257:106607467, gene15093:106608273, gene497:106589077	0.01082
182	BP	GO:1903524	positive regulation of blood circulation	gene17434:106610479, gene32862:100380418, gene4980:106590030, gene5016:106590330, gene6061:106598526, gene8520:106602157	0.01085
183	BP	GO:0035924	cellular response to vascular endothelia...	gene10457:106603906, gene15093:106608273, gene497:106589077	0.01122
184	BP	GO:0045747	positive regulation of Notch signaling p...	gene15093:106608273, gene22129:106561315, gene497:106589077	0.01122
185	BP	GO:0071243	cellular response to arsenic-containing ...	gene4980:106590030, gene5016:106590330	0.01155
186	BP	GO:0045168	cell-cell signaling involved in cell fat...	gene14257:106607467, gene15093:106608273, gene497:106589077	0.01184
187	BP	GO:0006970	response to osmotic stress	gene10745:106604170, gene18339:106611380, gene32862:100380418, gene38656:100136445, gene7265:106600850	0.01202
188	BP	GO:0051602	response to electrical stimulus	gene10457:106603906, gene38727:106577610, gene46456:106585027	0.01227
189	BP	GO:0007595	lactation	gene14257:106607467, gene39631:106578540, gene4714:106587516	0.01227
190	BP	GO:0060795	cell fate commitment involved in formati...	gene15093:106608273, gene28553:106567483, gene497:106589077	0.01227
191	BP	GO:0009179	purine ribonucleoside diphosphate metabo...	gene17920:106611031, gene37505:106576398, gene38727:106577610, gene4714:106587516	0.01238
192	BP	GO:0009135	purine nucleoside diphosphate metabolic ...	gene17920:106611031, gene37505:106576398, gene38727:106577610, gene4714:106587516	0.01238
193	BP	GO:0051196	regulation of coenzyme metabolic process	gene17920:106611031, gene38727:106577610, gene7265:106600850	0.01315
194	BP	GO:0006879	cellular iron ion homeostasis	gene24198:106563184, gene4980:106590030, gene5016:106590330	0.01337
195	BP	GO:0009185	ribonucleoside diphosphate metabolic pro...	gene17920:106611031, gene37505:106576398, gene38727:106577610, gene4714:106587516	0.01374
196	BP	GO:0071383	cellular response to steroid hormone sti...	gene10457:106603906, gene17434:106610479, gene37891:106576803, gene38727:106577610, gene7293:106600825, gene816:106601984, gene8520:106602157	0.01401
197	BP	GO:0048935	peripheral nervous system neuron develop...	gene15093:106608273, gene497:106589077	0.01422
198	BP	GO:2000505	regulation of energy homeostasis	gene38727:106577610, gene7293:106600825	0.01422
199	BP	GO:0006090	pyruvate metabolic process	gene17920:106611031, gene38727:106577610, gene4714:106587516, gene7265:106600850	0.01437
200	BP	GO:0035357	peroxisome proliferator activated recept...	gene19306:106612291, gene7265:106600850	0.01469
201	BP	GO:0048934	peripheral nervous system neuron differe...	gene15093:106608273, gene497:106589077	0.01469
202	BP	GO:0046677	response to antibiotic	gene10457:106603906, gene32862:100380418, gene37891:106576803	0.01477
203	BP	GO:0007589	body fluid secretion	gene10745:106604170, gene14257:106607467, gene39631:106578540, gene4714:106587516	0.01485
204	BP	GO:0071275	cellular response to aluminum ion	gene44237:106583131	0.01553
205	BP	GO:0017143	insecticide metabolic process	gene37891:106576803	0.01553
206	BP	GO:0010215	cellulose microfibril organization	gene22434:106561595	0.01553
207	BP	GO:0071505	response to mycophenolic acid	gene10457:106603906	0.01553
208	BP	GO:0071506	cellular response to mycophenolic acid	gene10457:106603906	0.01553
209	BP	GO:0071668	plant-type cell wall assembly	gene22434:106561595	0.01553
210	BP	GO:0003359	noradrenergic neuron fate commitment	gene22129:106561315	0.01553
211	BP	GO:0061100	lung neuroendocrine cell differentiation	gene22129:106561315	0.01553
212	BP	GO:0061103	carotid body glomus cell differentiation	gene22129:106561315	0.01553
213	BP	GO:0070726	cell wall assembly	gene22434:106561595	0.01553
214	BP	GO:1990502	dense core granule maturation	gene30144:106568821	0.01553
215	BP	GO:0071387	cellular response to cortisol stimulus	gene37891:106576803	0.01553
216	BP	GO:0060163	subpallium neuron fate commitment	gene22129:106561315	0.01553
217	BP	GO:0060165	regulation of timing of subpallium neuro...	gene22129:106561315	0.01553
218	BP	GO:2000406	positive regulation of T cell migration	gene32894:106571561, gene40600:106579494	0.01565
219	BP	GO:0046939	nucleotide phosphorylation	gene14257:106607467, gene17920:106611031, gene38727:106577610, gene4714:106587516	0.01568
220	BP	GO:0098840	protein transport along microtubule	gene24057:106563294, gene42253:106581181	0.01614
221	BP	GO:0042073	intraciliary transport	gene24057:106563294, gene42253:106581181	0.01614
222	BP	GO:0034383	low-density lipoprotein particle clearan...	gene4980:106590030, gene5016:106590330	0.01614
223	BP	GO:0051193	regulation of cofactor metabolic process	gene17920:106611031, gene38727:106577610, gene7265:106600850	0.0165
224	BP	GO:0009132	nucleoside diphosphate metabolic process	gene17920:106611031, gene37505:106576398, gene38727:106577610, gene4714:106587516	0.01654
225	BP	GO:0035006	melanization defense response	gene15093:106608273, gene497:106589077	0.01664
226	BP	GO:0030812	negative regulation of nucleotide catabo...	gene38727:106577610, gene816:106601984	0.01664
227	BP	GO:0010656	negative regulation of muscle cell apopt...	gene4980:106590030, gene5016:106590330, gene7265:106600850	0.01675
228	BP	GO:0031670	cellular response to nutrient	gene4980:106590030, gene5016:106590330, gene7265:106600850	0.0178
229	BP	GO:0032787	monocarboxylic acid metabolic process	gene17920:106611031, gene37891:106576803, gene38727:106577610, gene39631:106578540, gene4714:106587516, gene61616:106594092, gene7265:106600850, gene7293:106600825, gene816:106601984	0.01797
230	BP	GO:2000404	regulation of T cell migration	gene32894:106571561, gene40600:106579494	0.01816
231	BP	GO:0035206	regulation of hemocyte proliferation	gene15093:106608273, gene497:106589077	0.01816
232	BP	GO:0071259	cellular response to magnetism	gene22129:106561315	0.0186
233	BP	GO:0045583	regulation of cytotoxic T cell different...	gene32862:100380418	0.0186
234	BP	GO:0045585	positive regulation of cytotoxic T cell ...	gene32862:100380418	0.0186
235	BP	GO:0021757	caudate nucleus development	gene16077:106609245	0.0186
236	BP	GO:0021758	putamen development	gene16077:106609245	0.0186
237	BP	GO:0042904	9-cis-retinoic acid biosynthetic process	gene37891:106576803	0.0186
238	BP	GO:0042905	9-cis-retinoic acid metabolic process	gene37891:106576803	0.0186
239	BP	GO:0030821	negative regulation of cAMP catabolic pr...	gene816:106601984	0.0186
240	BP	GO:0046710	GDP metabolic process	gene17920:106611031	0.0186
241	BP	GO:0030806	negative regulation of cyclic nucleotide...	gene816:106601984	0.0186
242	BP	GO:0071496	cellular response to external stimulus	gene10457:106603906, gene17434:106610479, gene38656:100136445, gene45383:106584172, gene4980:106590030, gene5016:106590330, gene7265:106600850	0.01868
243	CC	GO:0035003	subapical complex	gene15093:106608273, gene497:106589077	0.00048
244	CC	GO:0016323	basolateral plasma membrane	gene14257:106607467, gene17434:106610479, gene23207:100136926, gene32862:100380418, gene38656:100136445, gene42294:106581151, gene48784:100136916, gene8520:106602157	0.00082
245	CC	GO:0042995	cell projection	gene14257:106607467, gene17434:106610479, gene18047:106611136, gene19306:106612291, gene22434:106561595, gene23207:100136926, gene24057:106563294, gene24198:106563184, gene27580:106566494, gene30144:106568821, gene31223:106569924, gene32862:100380418, gene33543:106572414, gene38727:106577610, gene39631:106578540, gene41906:106580757, gene42253:106581181, gene42294:106581151, gene43813:106582660, …	0.00123
246	CC	GO:0005890	sodium:potassium-exchanging ATPase compl...	gene17434:106610479, gene8520:106602157	0.00132
247	CC	GO:0000177	cytoplasmic exosome (RNase complex)	gene13954:106607159, gene7605:100194913	0.00181
248	CC	GO:0005901	caveola	gene17434:106610479, gene38656:100136445, gene4714:106587516, gene4980:106590030, gene5016:106590330	0.0038
249	CC	GO:0005912	adherens junction	gene14257:106607467, gene15093:106608273, gene16099:106609258, gene18339:106611380, gene24198:106563184, gene31223:106569924, gene32868:100194514, gene33543:106572414, gene41906:106580757, gene42294:106581151, gene497:106589077, gene7265:106600850	0.00384
250	CC	GO:0016023	cytoplasmic, membrane-bounded vesicle	gene15093:106608273, gene17434:106610479, gene17920:106611031, gene18047:106611136, gene24198:106563184, gene2525:106566875, gene30144:106568821, gene31223:106569924, gene32862:100380418, gene38656:100136445, gene41046:106580130, gene42294:106581151, gene43924:106582757, gene45874:106584584, gene46456:106585027, gene497:106589077, gene7265:106600850, gene8520:106602157	0.00492
251	CC	GO:0042470	melanosome	gene17434:106610479, gene32862:100380418, gene38656:100136445, gene8520:106602157	0.00677
252	CC	GO:0045202	synapse	gene14257:106607467, gene15093:106608273, gene17434:106610479, gene24198:106563184, gene30144:106568821, gene41906:106580757, gene42294:106581151, gene43813:106582660, gene46456:106585027, gene497:106589077, gene61616:106594092, gene7265:106600850, gene7293:106600825, gene8520:106602157	0.00832
253	CC	GO:0031528	microvillus membrane	gene23207:100136926, gene48784:100136916	0.0092
254	CC	GO:0005576	extracellular region	gene13022:106606374, gene13023:106606373, gene13954:106607159, gene14257:106607467, gene16099:106609258, gene17391:106610442, gene17434:106610479, gene17920:106611031, gene18339:106611380, gene22434:106561595, gene24057:106563294, gene24198:106563184, gene2525:106566875, gene26944:106566044, gene27580:106566494, gene30144:106568821, gene32862:100380418, gene32868:100194514, gene32894:106571561, g…	0.01065
255	CC	GO:0097458	neuron part	gene14257:106607467, gene17434:106610479, gene18047:106611136, gene22129:106561315, gene24198:106563184, gene27580:106566494, gene30144:106568821, gene31223:106569924, gene32862:100380418, gene38727:106577610, gene39631:106578540, gene42294:106581151, gene43813:106582660, gene43926:106582759, gene46456:106585027, gene6061:106598526, gene61616:106594092, gene7265:106600850, gene7293:106600825, gen…	0.01123
256	CC	GO:0031514	motile cilium	gene19306:106612291, gene42253:106581181, gene4714:106587516	0.01187
257	CC	GO:0044421	extracellular region part	gene13022:106606374, gene13023:106606373, gene13954:106607159, gene14257:106607467, gene16099:106609258, gene17434:106610479, gene17920:106611031, gene18339:106611380, gene22434:106561595, gene24057:106563294, gene24198:106563184, gene2525:106566875, gene27580:106566494, gene30144:106568821, gene32862:100380418, gene32868:100194514, gene32894:106571561, gene33543:106572414, gene37505:106576398, g…	0.01329
258	CC	GO:0070062	extracellular exosome	gene13022:106606374, gene13023:106606373, gene13954:106607159, gene14257:106607467, gene16099:106609258, gene17434:106610479, gene17920:106611031, gene18339:106611380, gene22434:106561595, gene24057:106563294, gene24198:106563184, gene2525:106566875, gene27580:106566494, gene30144:106568821, gene32862:100380418, gene32868:100194514, gene37505:106576398, gene38656:100136445, gene41046:106580130, g…	0.01403
259	CC	GO:0065010	extracellular membrane-bounded organelle	gene13022:106606374, gene13023:106606373, gene13954:106607159, gene14257:106607467, gene16099:106609258, gene17434:106610479, gene17920:106611031, gene18339:106611380, gene22434:106561595, gene24057:106563294, gene24198:106563184, gene2525:106566875, gene27580:106566494, gene30144:106568821, gene32862:100380418, gene32868:100194514, gene37505:106576398, gene38656:100136445, gene41046:106580130, g…	0.01434
260	CC	GO:1903561	extracellular vesicle	gene13022:106606374, gene13023:106606373, gene13954:106607159, gene14257:106607467, gene16099:106609258, gene17434:106610479, gene17920:106611031, gene18339:106611380, gene22434:106561595, gene24057:106563294, gene24198:106563184, gene2525:106566875, gene27580:106566494, gene30144:106568821, gene32862:100380418, gene32868:100194514, gene37505:106576398, gene38656:100136445, gene41046:106580130, g…	0.01491
261	CC	GO:0043230	extracellular organelle	gene13022:106606374, gene13023:106606373, gene13954:106607159, gene14257:106607467, gene16099:106609258, gene17434:106610479, gene17920:106611031, gene18339:106611380, gene22434:106561595, gene24057:106563294, gene24198:106563184, gene2525:106566875, gene27580:106566494, gene30144:106568821, gene32862:100380418, gene32868:100194514, gene37505:106576398, gene38656:100136445, gene41046:106580130, g…	0.01514
262	CC	GO:0044456	synapse part	gene14257:106607467, gene17434:106610479, gene24198:106563184, gene30144:106568821, gene41906:106580757, gene42294:106581151, gene46456:106585027, gene61616:106594092, gene7265:106600850, gene7293:106600825, gene8520:106602157	0.01557
263	CC	GO:0044463	cell projection part	gene14257:106607467, gene17434:106610479, gene23207:100136926, gene24198:106563184, gene30144:106568821, gene32862:100380418, gene41906:106580757, gene42253:106581181, gene42294:106581151, gene43813:106582660, gene46456:106585027, gene4714:106587516, gene48784:100136916, gene61616:106594092, gene7265:106600850, gene7293:106600825, gene8520:106602157	0.01649
264	CC	GO:0030139	endocytic vesicle	gene15093:106608273, gene24198:106563184, gene31223:106569924, gene32862:100380418, gene45874:106584584, gene497:106589077	0.01674
265	CC	GO:0043186	P granule	gene13954:106607159, gene7605:100194913	0.0169
266	CC	GO:0060293	germ plasm	gene13954:106607159, gene7605:100194913	0.0169
267	CC	GO:0072562	blood microparticle	gene13022:106606374, gene13023:106606373, gene38656:100136445	0.01835
268	CC	GO:0045495	pole plasm	gene13954:106607159, gene7605:100194913	0.02096
269	CC	GO:0005938	cell cortex	gene15093:106608273, gene22434:106561595, gene33543:106572414, gene38656:100136445, gene41046:106580130, gene497:106589077, gene61616:106594092	0.02304
270	CC	GO:0030315	T-tubule	gene17434:106610479, gene38656:100136445, gene8520:106602157	0.02397
271	CC	GO:0055028	cortical microtubule	gene22434:106561595	0.02674
272	CC	GO:0022627	cytosolic small ribosomal subunit	gene16099:106609258, gene32868:100194514	0.03075
273	CC	GO:1990589	ATF4-CREB1 transcription factor complex	gene39631:106578540	0.03259
274	CC	GO:0035061	interchromatin granule	gene44237:106583131	0.03259
275	CC	GO:0098793	presynapse	gene14257:106607467, gene24198:106563184, gene30144:106568821, gene42294:106581151, gene46456:106585027, gene61616:106594092	0.03289
276	CC	GO:0099568	cytoplasmic region	gene15093:106608273, gene22434:106561595, gene33543:106572414, gene38656:100136445, gene41046:106580130, gene497:106589077, gene61616:106594092	0.03351
277	CC	GO:0000220	vacuolar proton-transporting V-type ATPa...	gene24198:106563184	0.0355
278	CC	GO:0005967	mitochondrial pyruvate dehydrogenase com...	gene7265:106600850	0.0355
279	CC	GO:0048471	perinuclear region of cytoplasm	gene15093:106608273, gene18047:106611136, gene23207:100136926, gene2525:106566875, gene32862:100380418, gene38656:100136445, gene46456:106585027, gene48784:100136916, gene497:106589077, gene4980:106590030, gene5016:106590330	0.03722
280	CC	GO:0005615	extracellular space	gene13022:106606374, gene13023:106606373, gene14257:106607467, gene17920:106611031, gene2525:106566875, gene33543:106572414, gene38656:100136445, gene40600:106579494, gene43926:106582759, gene4980:106590030, gene5016:106590330	0.03756
281	CC	GO:0022626	cytosolic ribosome	gene16099:106609258, gene32868:100194514, gene38727:106577610	0.03808
282	CC	GO:0060200	clathrin-sculpted acetylcholine transpor...	gene46456:106585027	0.0384
283	CC	GO:0060201	clathrin-sculpted acetylcholine transpor...	gene46456:106585027	0.0384
284	CC	GO:0097223	sperm part	gene24198:106563184, gene46456:106585027, gene4714:106587516	0.03925
285	CC	GO:0005719	nuclear euchromatin	gene38727:106577610, gene39631:106578540	0.04201
286	CC	GO:0043005	neuron projection	gene14257:106607467, gene18047:106611136, gene24198:106563184, gene27580:106566494, gene30144:106568821, gene32862:100380418, gene38727:106577610, gene39631:106578540, gene42294:106581151, gene43813:106582660, gene43926:106582759, gene46456:106585027, gene6061:106598526, gene61616:106594092, gene7293:106600825, gene816:106601984	0.04284
287	CC	GO:0030670	phagocytic vesicle membrane	gene24198:106563184, gene45874:106584584	0.04413
288	CC	GO:0005720	nuclear heterochromatin	gene23207:100136926, gene48784:100136916	0.04924
289	CC	GO:0005790	smooth endoplasmic reticulum	gene23207:100136926, gene48784:100136916	0.04924
290	CC	GO:0044445	cytosolic part	gene16099:106609258, gene32868:100194514, gene38727:106577610, gene43813:106582660	0.04958
291	CC	GO:0034992	microtubule organizing center attachment...	gene41906:106580757	0.04992
292	CC	GO:0034993	LINC complex	gene41906:106580757	0.04992
293	CC	GO:0033179	proton-transporting V-type ATPase, V0 do...	gene24198:106563184	0.04992
294	CC	GO:0045254	pyruvate dehydrogenase complex	gene7265:106600850	0.04992

## Sheet: BPplot
category	ID	term	count	genes	logFC	adj_pval	zscore	Treat	flag
BP	GO:0022029	telencephalon cell migration	6	GENE2715:106567959	1.23608	0.00094	0.816497	LL	No overlap
BP	GO:0008037	cell recognition	8	GENE26964:106566029	1.22313	0.00116	1.41421	LL	No overlap
BP	GO:0002064	epithelial cell development	12	GENE14239:106607477	1.0885	0.0018	2.3094	LL	No overlap
BP	GO:0007204	positive regulation of cytosolic calcium...	9	GENE14239:106607477	1.0885	0.00238	2.33333	LL	No overlap
BP	GO:0043500	muscle adaptation	8	GENE18957:106611923	1.42065	0.00252	1.41421	LL	No overlap
BP	GO:2000377	regulation of reactive oxygen species me...	8	GENE14239:106607477	1.0885	0.00267	2.12132	LL	No overlap
BP	GO:0043627	response to estrogen	10	GENE18957:106611923	1.42065	0.00293	1.26491	LL	No overlap
BP	GO:0000422	mitophagy	8	GENE14239:106607477	1.0885	0.003	1.41421	LL	No overlap
BP	GO:0048771	tissue remodeling	8	GENE13950:106607162	1.01559	0.00317	2.12132	LL	LL & SPLL
BP	GO:0030334	regulation of cell migration	21	GENE1291:106607406	-1.12458	0.00397	2.83683	LL	No overlap
BP	GO:0051591	response to cAMP	6	GENE14257:106607467	1.36419	0.00434	1.63299	LL	LL, SP & SPLL
BP	GO:0000302	response to reactive oxygen species	9	GENE14239:106607477	1.0885	0.00576	3	LL	LL & SPLL
BP	GO:0051147	regulation of muscle cell differentiatio...	8	GENE18339:106611380	1.88692	0.00588	0.707107	LL	No overlap
BP	GO:0019722	calcium-mediated signaling	7	GENE13954:106607159	2.87944	0.00649	2.64575	LL	No overlap
BP	GO:0050767	regulation of neurogenesis	21	GENE10188:106603639	1.71384	0.00656	1.96396	LL	No overlap
BP	GO:0015711	organic anion transport	10	GENE18767:106611738	1.29387	0.00659	1.89737	LL	No overlap
BP	GO:0055085	transmembrane transport	25	GENE10745:106604170	1.67981	0.00788	3	LL	No overlap
BP	GO:1903522	regulation of blood circulation	10	GENE13950:106607162	1.01559	0.00907	3.16228	LL	No overlap
BP	GO:0001894	tissue homeostasis	8	GENE13950:106607162	1.01559	0.00941	2.12132	LL	No overlap
BP	GO:0006811	ion transport	31	GENE10745:106604170	1.67981	0.01181	4.13092	LL	No overlap
BP	GO:0001764	neuron migration	7	GENE2715:106567959	1.23608	0.01221	1.13389	LL	No overlap
BP	GO:0032388	positive regulation of intracellular tra...	11	GENE14239:106607477	1.0885	0.01247	1.50756	LL	No overlap
BP	GO:1903651	positive regulation of cytoplasmic trans...	9	GENE14239:106607477	1.0885	0.01313	1.66667	LL	No overlap
BP	GO:0009266	response to temperature stimulus	9	GENE18957:106611923	1.42065	0.01361	2.33333	LL	No overlap
BP	GO:0001892	embryonic placenta development	6	GENE13950:106607162	1.01559	0.0144	0.816497	LL	No overlap
BP	GO:0006970	response to osmotic stress	6	GENE10745:106604170	1.67981	0.01469	2.44949	LL	No overlap
BP	GO:0002066	columnar/cuboidal epithelial cell develo...	6	GENE14239:106607477	1.0885	0.01561	2.44949	LL	No overlap
BP	GO:0001678	cellular glucose homeostasis	6	GENE14239:106607477	1.0885	0.01593	2.44949	LL	No overlap
BP	GO:0001501	skeletal system development	14	GENE10188:106603639	1.71384	0.01618	0.534522	LL	No overlap
BP	GO:0060047	heart contraction	9	GENE13950:106607162	1.01559	0.0162	3	LL	No overlap
BP	GO:0030099	myeloid cell differentiation	12	GENE10188:106603639	1.71384	0.01622	1.73205	LL	No overlap
BP	GO:0030336	negative regulation of cell migration	8	GENE1291:106607406	-1.12458	0.01668	1.41421	LL	No overlap
BP	GO:0003015	heart process	9	GENE13950:106607162	1.01559	0.01687	3	LL	No overlap
BP	GO:0001666	response to hypoxia	12	GENE13950:106607162	1.01559	0.01709	2.88675	LL	No overlap
BP	GO:0043065	positive regulation of apoptotic process	16	GENE10188:106603639	1.71384	0.01739	1.5	LL	No overlap
BP	GO:0040013	negative regulation of locomotion	9	GENE1291:106607406	-1.12458	0.01756	1.66667	LL	No overlap
BP	GO:1903829	positive regulation of cellular protein ...	10	GENE14239:106607477	1.0885	0.01778	0.632456	LL	No overlap
BP	GO:0061448	connective tissue development	9	GENE10188:106603639	1.71384	0.01792	0.333333	LL	No overlap
BP	GO:0042060	wound healing	16	GENE1291:106607406	-1.12458	0.01853	1.5	LL	No overlap
BP	GO:0050769	positive regulation of neurogenesis	13	GENE18767:106611738	1.29387	0.01871	1.38675	LL	No overlap
BP	GO:2000146	negative regulation of cell motility	8	GENE1291:106607406	-1.12458	0.01891	1.41421	LL	No overlap
BP	GO:0003333	amino acid transmembrane transport	16	GENE11330:106604686	-1.03053	5e-08	2.5	SP	No overlap
BP	GO:0048662	negative regulation of smooth muscle cel...	11	GENE15578:106608616	1.40285	7.8e-06	2.7136	SP	No overlap
BP	GO:0045668	negative regulation of osteoblast differ...	17	GENE11332:106604687	1.93602	2.5e-05	1.21268	SP	No overlap
BP	GO:0010871	negative regulation of receptor biosynth...	7	GENE11900:100136378	2.00047	2.8e-05	1.88982	SP	No overlap
BP	GO:0032570	response to progesterone	13	GENE10970:106604332	1.04911	0.0001	2.49615	SP	No overlap
BP	GO:0007588	excretion	13	GENE11572:106604929	-1.33769	0.0001	1.94145	SP	No overlap
BP	GO:0015804	neutral amino acid transport	11	GENE11330:106604686	-1.03053	0.00011	2.11058	SP	No overlap
BP	GO:0071850	mitotic cell cycle arrest	7	GENE16375:106609395	1.56911	0.00012	-0.377964	SP	No overlap
BP	GO:0006814	sodium ion transport	30	GENE10970:106604332	1.04911	0.00014	4.74693	SP	No overlap
BP	GO:0051591	response to cAMP	20	GENE11362:106604712	-1.51308	0.00019	1.78885	SP	LL, SP & SPLL
BP	GO:0071222	cellular response to lipopolysaccharide	23	GENE11900:100136378	2.00047	0.0002	3.12772	SP	No overlap
BP	GO:0032922	circadian regulation of gene expression	15	GENE11332:106604687	1.93602	0.00024	3.35659	SP	No overlap
BP	GO:0010745	negative regulation of macrophage derive...	7	GENE16790:106609880	1.04723	0.00025	1.13389	SP	No overlap
BP	GO:0035094	response to nicotine	11	GENE11330:106604686	-1.03053	0.00045	1.50756	SP	No overlap
BP	GO:0042752	regulation of circadian rhythm	19	GENE11332:106604687	1.93602	0.00048	3.44124	SP	No overlap
BP	GO:0032355	response to estradiol	26	GENE11362:106604712	-1.51308	0.00055	1.96116	SP	No overlap
BP	GO:0014912	negative regulation of smooth muscle cel...	8	GENE15578:106608616	1.40285	0.00064	2.12132	SP	No overlap
BP	GO:0051384	response to glucocorticoid	23	GENE10970:106604332	1.04911	0.00069	2.29366	SP	No overlap
BP	GO:0060452	positive regulation of cardiac muscle co...	6	GENE11572:106604929	-1.33769	0.00084	0.816497	SP	No overlap
BP	GO:0042026	protein refolding	9	GENE19986:106613013	1.10778	0.00102	2.33333	SP	No overlap
BP	GO:0071456	cellular response to hypoxia	25	GENE10424:106603870	1.15294	0.00109	3.4	SP	SP & SPLL
BP	GO:0035864	response to potassium ion	9	GENE13758:106606996	-1.33405	0.00111	1.66667	SP	No overlap
BP	GO:0051385	response to mineralocorticoid	9	GENE13819:106607038	-1.05388	0.00176	0.333333	SP	No overlap
BP	GO:0071248	cellular response to metal ion	30	GENE13758:106606996	-1.33405	0.00179	2.19089	SP	No overlap
BP	GO:0001816	cytokine production	63	GENE10440:106603888	-1.0837	0.00189	2.39377	SP	No overlap
BP	GO:0006835	dicarboxylic acid transport	13	GENE11330:106604686	-1.03053	0.00198	1.38675	SP	No overlap
BP	GO:0045600	positive regulation of fat cell differen...	12	GENE10188:106603639	1.95172	0.0021	2.88675	SP	No overlap
BP	GO:0051930	regulation of sensory perception of pain	7	GENE10970:106604332	1.04911	0.0024	0.377964	SP	No overlap
BP	GO:0072337	modified amino acid transport	6	GENE11330:106604686	-1.03053	0.00253	1.63299	SP	No overlap
BP	GO:0046321	positive regulation of fatty acid oxidat...	7	GENE15578:106608616	1.40285	0.00259	1.88982	SP	No overlap
BP	GO:0007589	body fluid secretion	16	GENE10745:106604170	2.32934	0.0026	2	SP	No overlap
BP	GO:0071371	cellular response to gonadotropin stimul...	6	GENE15578:106608616	1.40285	0.00301	1.63299	SP	No overlap
BP	GO:0006111	regulation of gluconeogenesis	13	GENE11900:100136378	2.00047	0.00313	3.05085	SP	No overlap
BP	GO:0055078	sodium ion homeostasis	8	GENE2772:106568685	1.02458	0.00326	2.82843	SP	No overlap
BP	GO:0006954	inflammatory response	48	GENE10316:106603784	-1.07359	0.00346	2.88675	SP	No overlap
BP	GO:0006195	purine nucleotide catabolic process	9	GENE14024:106607370	-1.27248	0.00363	-1	SP	No overlap
BP	GO:0043502	regulation of muscle adaptation	14	GENE15578:106608616	1.40285	0.00393	2.13809	SP	No overlap
BP	GO:1900034	regulation of cellular response to heat	10	GENE19986:106613013	1.10778	0.00413	2.52982	SP	No overlap
BP	GO:0071871	response to epinephrine	6	GENE15578:106608616	1.40285	0.00485	1.63299	SP	No overlap
BP	GO:0046717	acid secretion	13	GENE16405:106609517	1.21035	0.0049	1.94145	SP	No overlap
BP	GO:0000122	negative regulation of transcription fro...	76	GENE10188:106603639	1.95172	0.0051	3.90007	SP	No overlap
BP	GO:0010874	regulation of cholesterol efflux	6	GENE16790:106609880	1.04723	0.00522	0.816497	SP	No overlap
BP	GO:1902624	positive regulation of neutrophil migrat...	7	GENE2424:106565855	-1.50055	0.0054	0.377964	SP	No overlap
BP	GO:0009612	response to mechanical stimulus	32	GENE11362:106604712	-1.51308	0.00558	2.47487	SP	No overlap
BP	GO:0007568	aging	47	GENE10970:106604332	1.04911	0.00581	2.77143	SP	No overlap
BP	GO:0002703	regulation of leukocyte mediated immunit...	19	GENE14239:106607477	1.87243	0.00587	2.9824	SP	No overlap
BP	GO:0006836	neurotransmitter transport	25	GENE12169:106605517	3.90852	0.006	3	SP	No overlap
BP	GO:0070486	leukocyte aggregation	52	GENE10188:106603639	1.95172	0.00614	2.2188	SP	No overlap
BP	GO:0007519	skeletal muscle tissue development	28	GENE10745:106604170	2.32934	0.00625	4.15761	SP	No overlap
BP	GO:0023061	signal release	48	GENE10970:106604332	1.04911	0.00629	3.17543	SP	No overlap
BP	GO:0014898	cardiac muscle hypertrophy in response t...	6	GENE12239:100194549	1.9015	0.00646	1.63299	SP	No overlap
BP	GO:0070229	negative regulation of lymphocyte apopto...	7	GENE10745:106604170	2.32934	0.00685	2.64575	SP	No overlap
BP	GO:0045445	myoblast differentiation	13	GENE13721:106606950	1.17841	0.00686	2.49615	SP	No overlap
BP	GO:0050867	positive regulation of cell activation	30	GENE10188:106603639	1.95172	0.00688	2.92119	SP	No overlap
BP	GO:0071333	cellular response to glucose stimulus	18	GENE11900:100136378	2.00047	0.00703	1.41421	SP	No overlap
BP	GO:0042542	response to hydrogen peroxide	20	GENE13758:106606996	-1.33405	0.00716	2.23607	SP	No overlap
BP	GO:0002573	myeloid leukocyte differentiation	27	GENE13819:106607038	-1.05388	0.00733	2.88675	SP	No overlap
BP	GO:0010518	positive regulation of phospholipase act...	13	GENE11572:106604929	-1.33769	0.00755	1.94145	SP	No overlap
BP	GO:0045629	negative regulation of T-helper 2 cell d...	7	GENE10316:106603784	-1.07359	0.00768	-1.88982	SP	No overlap
BP	GO:0019933	cAMP-mediated signaling	10	GENE21124:106560302	1.66647	0.00781	1.26491	SP	No overlap
BP	GO:0048869	cellular developmental process	318	GENE10012:106603555	1.46348	0.00786	5.71988	SP	No overlap
BP	GO:1990089	response to nerve growth factor	11	GENE15601:106608778	1.22494	0.00819	2.7136	SP	No overlap
BP	GO:0010656	negative regulation of muscle cell apopt...	10	GENE14239:106607477	1.87243	0.00845	2.52982	SP	No overlap
BP	GO:0071398	cellular response to fatty acid	11	GENE14239:106607477	1.87243	0.0088	2.7136	SP	No overlap
BP	GO:0002028	regulation of sodium ion transport	14	GENE10970:106604332	1.04911	0.00889	3.74166	SP	No overlap
BP	GO:0045776	negative regulation of blood pressure	9	GENE10970:106604332	1.04911	0.0089	1.66667	SP	No overlap
BP	GO:0046697	decidualization	6	GENE13819:106607038	-1.05388	0.00899	0.816497	SP	No overlap
BP	GO:0002027	regulation of heart rate	15	GENE11572:106604929	-1.33769	0.00906	2.32379	SP	No overlap
BP	GO:0032370	positive regulation of lipid transport	10	GENE16790:106609880	1.04723	0.00913	0	SP	No overlap
BP	GO:0045913	positive regulation of carbohydrate meta...	13	GENE11572:106604929	-1.33769	0.00939	2.49615	SP	No overlap
BP	GO:1900373	positive regulation of purine nucleotide...	11	GENE10970:106604332	1.04911	0.00944	2.11058	SP	No overlap
BP	GO:0009409	response to cold	11	GENE10389:106603841	-1.94301	0.00944	0.904534	SP	No overlap
BP	GO:0001913	T cell mediated cytotoxicity	6	GENE15897:106608992	1.51499	0.00957	1.63299	SP	No overlap
BP	GO:0002763	positive regulation of myeloid leukocyte...	9	GENE15578:106608616	1.40285	0.01002	2.33333	SP	No overlap
BP	GO:0070489	T cell aggregation	50	GENE10188:106603639	1.95172	0.01033	1.9799	SP	No overlap
BP	GO:0042110	T cell activation	50	GENE10188:106603639	1.95172	0.01033	1.9799	SP	No overlap
BP	GO:0001708	cell fate specification	18	GENE16164:106609323	1.17162	0.01081	0.471405	SP	No overlap
BP	GO:0007269	neurotransmitter secretion	21	GENE14257:106607467	1.46256	0.01095	2.83683	SP	No overlap
BP	GO:0071456	cellular response to hypoxia	7	GENE10457:106603906	1.21348	0.00061	2.64575	SPLL	SP & SPLL
BP	GO:0051591	response to cAMP	6	GENE10457:106603906	1.21348	0.00065	2.44949	SPLL	LL, SP & SPLL
BP	GO:2000377	regulation of reactive oxygen species me...	7	GENE14257:106607467	1.17862	0.00127	1.13389	SPLL	No overlap
BP	GO:0000302	response to reactive oxygen species	8	GENE20083:106613089	-1.9093	0.00193	2.12132	SPLL	LL & SPLL
BP	GO:0048545	response to steroid hormone	12	GENE10457:106603906	1.21348	0.0051	2.3094	SPLL	No overlap
BP	GO:0019932	second-messenger-mediated signaling	7	GENE13954:106607159	2.8757	0.00623	1.88982	SPLL	No overlap
BP	GO:0048771	tissue remodeling	6	GENE15093:106608273	1.4347	0.00686	2.44949	SPLL	LL & SPLL
BP	GO:0043523	regulation of neuron apoptotic process	7	GENE10457:106603906	1.21348	0.00771	1.13389	SPLL	No overlap
BP	GO:0019752	carboxylic acid metabolic process	13	GENE17920:106611031	2.03166	0.00855	2.49615	SPLL	No overlap
BP	GO:1903524	positive regulation of blood circulation	6	GENE17434:106610479	-1.17147	0.01085	0.816497	SPLL	No overlap
BP	GO:0071383	cellular response to steroid hormone sti...	7	GENE10457:106603906	1.21348	0.01401	1.13389	SPLL	No overlap
BP	GO:0032787	monocarboxylic acid metabolic process	9	GENE17920:106611031	2.03166	0.01797	3	SPLL	No overlap
BP	GO:0071496	cellular response to external stimulus	7	GENE10457:106603906	1.21348	0.01868	1.13389	SPLL	No overlap

## Sheet: MFplot
category	ID	term	count	genes	logFC	adj_pval	zscore	Treat	flag
MF	GO:0042803	protein homodimerization activity	19	GENE10188:106603639	1.71384	0.0011	1.60591	LL	LL & SPLL
MF	GO:0005102	receptor binding	27	GENE1291:106607406	-1.12458	0.00259	3.27165	LL	No overlap
MF	GO:0030165	PDZ domain binding	6	GENE14257:106607467	1.36419	0.00518	2.44949	LL	No overlap
MF	GO:0030674	protein binding, bridging	7	GENE20824:106613792	1.08235	0.00537	0.377964	LL	LL & SP
MF	GO:0001078	transcriptional repressor activity, RNA ...	6	GENE16077:106609245	1.19793	0.00828	-0.816497	LL	LL & SP
MF	GO:0001077	transcriptional activator activity, RNA ...	8	GENE13950:106607162	1.01559	0.0139	-0.707107	LL	LL & SPLL
MF	GO:0001228	transcriptional activator activity, RNA ...	9	GENE13950:106607162	1.01559	0.01455	-0.333333	LL	LL, SP & SPLL
MF	GO:0008092	cytoskeletal protein binding	19	GENE18339:106611380	1.88692	0.02763	2.06474	LL	LL, SP & SPLL
MF	GO:0000977	RNA polymerase II regulatory region sequ...	12	GENE10188:106603639	1.71384	0.03594	1.1547	LL	LL, SP & SPLL
MF	GO:0001012	RNA polymerase II regulatory region DNA ...	12	GENE10188:106603639	1.71384	0.04021	1.1547	LL	LL & SPLL
MF	GO:0019899	enzyme binding	31	GENE13298:106606647	-1.44363	0.04722	1.97566	LL	LL, SP & SPLL
MF	GO:0005328	neurotransmitter:sodium symporter activi...	7	GENE12169:106605517	3.90852	1.8e-05	2.64575	SP	No overlap
MF	GO:0001078	transcriptional repressor activity, RNA ...	24	GENE11900:100136378	2.00047	3.4e-05	2.04124	SP	LL & SP
MF	GO:0000977	RNA polymerase II regulatory region sequ...	63	GENE10188:106603639	1.95172	0.00027	1.38587	SP	LL, SP & SPLL
MF	GO:0015171	amino acid transmembrane transporter act...	17	GENE11330:106604686	-1.03053	0.00027	2.18282	SP	No overlap
MF	GO:0015175	neutral amino acid transmembrane transpo...	8	GENE11330:106604686	-1.03053	0.00029	1.41421	SP	No overlap
MF	GO:0001046	core promoter sequence-specific DNA bind...	20	GENE11900:100136378	2.00047	0.00033	1.78885	SP	No overlap
MF	GO:0005159	insulin-like growth factor receptor bind...	7	GENE15601:106608778	1.22494	0.00057	-0.377964	SP	No overlap
MF	GO:0030674	protein binding, bridging	23	GENE12239:100194549	1.9015	0.00132	1.87663	SP	LL & SP
MF	GO:0004879	RNA polymerase II transcription factor a...	10	GENE11900:100136378	2.00047	0.00156	1.89737	SP	No overlap
MF	GO:0003700	transcription factor activity, sequence-...	94	GENE10188:106603639	1.95172	0.00174	0.412568	SP	No overlap
MF	GO:1901682	sulfur compound transmembrane transporte...	6	GENE11330:106604686	-1.03053	0.00183	1.63299	SP	No overlap
MF	GO:0020037	heme binding	11	GENE11900:100136378	2.00047	0.00192	3.31662	SP	SP & SPLL
MF	GO:0031072	heat shock protein binding	17	GENE18991:106611988	1.43596	0.00219	4.12311	SP	No overlap
MF	GO:0035591	signaling adaptor activity	13	GENE15601:106608778	1.22494	0.00269	0.83205	SP	No overlap
MF	GO:0015293	symporter activity	16	GENE12169:106605517	3.90852	0.00369	3.5	SP	No overlap
MF	GO:0001221	transcription cofactor binding	8	GENE11900:100136378	2.00047	0.0051	2.12132	SP	No overlap
MF	GO:0051082	unfolded protein binding	12	GENE19986:106613013	1.10778	0.00525	1.73205	SP	No overlap
MF	GO:0005158	insulin receptor binding	8	GENE14239:106607477	1.87243	0.00538	2.12132	SP	No overlap
MF	GO:0003707	steroid hormone receptor activity	8	GENE11900:100136378	2.00047	0.00597	1.41421	SP	No overlap
MF	GO:0019899	enzyme binding	151	GENE10970:106604332	1.04911	0.00672	5.28962	SP	LL, SP & SPLL
MF	GO:0008144	drug binding	13	GENE10970:106604332	1.04911	0.00814	2.49615	SP	No overlap
MF	GO:0031690	adrenergic receptor binding	6	GENE16375:106609395	1.56911	0.00857	0.816497	SP	No overlap
MF	GO:0000980	RNA polymerase II distal enhancer sequen...	14	GENE10188:106603639	1.95172	0.00996	2.67261	SP	No overlap
MF	GO:0099600	transmembrane receptor activity	50	GENE10970:106604332	1.04911	0.01028	2.82843	SP	No overlap
MF	GO:0005070	SH3/SH2 adaptor activity	9	GENE16063:106609150	1.15878	0.01243	0.333333	SP	No overlap
MF	GO:0044389	ubiquitin-like protein ligase binding	29	GENE15578:106608616	1.40285	0.01538	2.04265	SP	No overlap
MF	GO:0038023	signaling receptor activity	55	GENE10970:106604332	1.04911	0.01734	3.371	SP	No overlap
MF	GO:0008134	transcription factor binding	61	GENE10745:106604170	2.32934	0.01875	4.73736	SP	SP & SPLL
MF	GO:0004930	G-protein coupled receptor activity	27	GENE10970:106604332	1.04911	0.01881	1.34715	SP	No overlap
MF	GO:0031625	ubiquitin protein ligase binding	28	GENE15578:106608616	1.40285	0.02088	1.88982	SP	No overlap
MF	GO:0042805	actinin binding	8	GENE16375:106609395	1.56911	0.02117	2.82843	SP	No overlap
MF	GO:0004888	transmembrane signaling receptor activit...	46	GENE10970:106604332	1.04911	0.02497	2.94884	SP	No overlap
MF	GO:0001228	transcriptional activator activity, RNA ...	30	GENE13721:106606950	1.17841	0.02822	1.82574	SP	LL, SP & SPLL
MF	GO:0000987	core promoter proximal region sequence-s...	33	GENE11900:100136378	2.00047	0.02823	2.26301	SP	No overlap
MF	GO:0001159	core promoter proximal region DNA bindin...	33	GENE11900:100136378	2.00047	0.02823	2.26301	SP	No overlap
MF	GO:0042826	histone deacetylase binding	16	GENE19475:106612460	1.72081	0.0314	-0.5	SP	No overlap
MF	GO:0008138	protein tyrosine/serine/threonine phosph...	7	GENE2257:106563492	-1.31941	0.03474	1.88982	SP	No overlap
MF	GO:0042277	peptide binding	19	GENE11497:106604868	1.04341	0.03849	2.06474	SP	No overlap
MF	GO:0015370	solute:sodium symporter activity	10	GENE12169:106605517	3.90852	0.04114	2.52982	SP	No overlap
MF	GO:0008092	cytoskeletal protein binding	68	GENE11499:106604864	-1.40755	0.04219	5.57832	SP	LL, SP & SPLL
MF	GO:0051393	alpha-actinin binding	6	GENE16375:106609395	1.56911	0.04291	2.44949	SP	No overlap
MF	GO:0000978	RNA polymerase II core promoter proximal...	31	GENE11900:100136378	2.00047	0.04602	2.69408	SP	No overlap
MF	GO:0004872	receptor activity	62	GENE10970:106604332	1.04911	0.0495	3.556	SP	No overlap
MF	GO:0020037	heme binding	6	GENE23207:100136926	2.44598	1.1e-05	2.44949	SPLL	SP & SPLL
MF	GO:0000982	transcription factor activity, RNA polym...	9	GENE10457:106603906	1.21348	0.00313	1	SPLL	No overlap
MF	GO:0042802	identical protein binding	20	GENE1470:106609366	1.56348	0.00432	1.34164	SPLL	No overlap
MF	GO:0016705	oxidoreductase activity, acting on paire...	6	GENE23207:100136926	2.44598	0.00744	2.44949	SPLL	No overlap
MF	GO:0001228	transcriptional activator activity, RNA ...	7	GENE10457:106603906	1.21348	0.01728	1.13389	SPLL	LL, SP & SPLL
MF	GO:0017111	nucleoside-triphosphatase activity	12	GENE17434:106610479	-1.17147	0.01978	0	SPLL	No overlap
MF	GO:0008134	transcription factor binding	11	GENE10457:106603906	1.21348	0.02018	2.11058	SPLL	SP & SPLL
MF	GO:0001077	transcriptional activator activity, RNA ...	6	GENE10457:106603906	1.21348	0.02284	0.816497	SPLL	LL & SPLL
MF	GO:0008092	cytoskeletal protein binding	13	GENE11499:106604864	-1.26147	0.02335	0.27735	SPLL	LL, SP & SPLL
MF	GO:0019899	enzyme binding	24	GENE10457:106603906	1.21348	0.02384	1.63299	SPLL	LL, SP & SPLL
MF	GO:0016887	ATPase activity	8	GENE17434:106610479	-1.17147	0.04026	0	SPLL	No overlap
MF	GO:0042803	protein homodimerization activity	11	GENE16077:106609245	1.09435	0.04148	0.904534	SPLL	LL & SPLL
MF	GO:0000977	RNA polymerase II regulatory region sequ...	9	GENE10457:106603906	1.21348	0.04364	1.66667	SPLL	LL, SP & SPLL
MF	GO:0001012	RNA polymerase II regulatory region DNA ...	9	GENE10457:106603906	1.21348	0.04783	1.66667	SPLL	LL & SPLL

## Sheet: CCplot
category	ID	term	count	genes	logFC	adj_pval	zscore	Treat	flag
CC	GO:0016323	basolateral plasma membrane	12	GENE14257:106607467	1.36419	3.2e-05	2.3094	LL	LL, SP & SPLL
CC	GO:0043005	neuron projection	26	GENE14257:106607467	1.36419	0.0026	3.13786	LL	LL & SPLL
CC	GO:0009897	external side of plasma membrane	7	GENE1291:106607406	-1.12458	0.0028	1.13389	LL	No overlap
CC	GO:0016023	cytoplasmic, membrane-bounded vesicle	21	GENE1291:106607406	-1.12458	0.0029	2.83683	LL	LL & SPLL
CC	GO:0005886	plasma membrane	60	GENE10188:106603639	1.71384	0.0038	3.35659	LL	No overlap
CC	GO:0045202	synapse	19	GENE14239:106607477	1.0885	0.0052	1.60591	LL	LL & SPLL
CC	GO:0070161	anchoring junction	15	GENE1291:106607406	-1.12458	0.0073	1.29099	LL	No overlap
CC	GO:0005912	adherens junction	14	GENE1291:106607406	-1.12458	0.0135	1.60357	LL	LL & SPLL
CC	GO:0031226	intrinsic component of plasma membrane	19	GENE1291:106607406	-1.12458	0.0142	1.14708	LL	No overlap
CC	GO:0044456	synapse part	14	GENE14239:106607477	1.0885	0.0209	1.60357	LL	LL, SP & SPLL
CC	GO:0044463	cell projection part	24	GENE14239:106607477	1.0885	0.0216	2.44949	LL	LL, SP & SPLL
CC	GO:0098793	presynapse	8	GENE14257:106607467	1.36419	0.0238	2.12132	LL	LL & SPLL
CC	GO:0033267	axon part	8	GENE18791:106611717	2.20999	0.0294	2.12132	LL	No overlap
CC	GO:0005887	integral component of plasma membrane	17	GENE13298:106606647	-1.44363	0.0354	1.21268	LL	LL & SP
CC	GO:0030426	growth cone	6	GENE18791:106611717	2.20999	0.037	1.63299	LL	No overlap
CC	GO:0005739	mitochondrion	25	GENE1291:106607406	-1.12458	0.0422	1.8	LL	No overlap
CC	GO:0044459	plasma membrane part	152	GENE10970:106604332	1.04911	0.0014	5.67775	SP	No overlap
CC	GO:0001917	photoreceptor inner segment	8	GENE19986:106613013	1.10778	0.0033	1.41421	SP	No overlap
CC	GO:0042995	cell projection	153	GENE10012:106603555	1.46348	0.0048	7.68029	SP	SP & SPLL
CC	GO:0097440	apical dendrite	6	GENE10424:106603870	1.15294	0.0048	2.44949	SP	No overlap
CC	GO:0005887	integral component of plasma membrane	67	GENE10970:106604332	1.04911	0.0074	4.03159	SP	LL & SP
CC	GO:0000791	euchromatin	9	GENE13819:106607038	-1.05388	0.009	0.333333	SP	No overlap
CC	GO:0016323	basolateral plasma membrane	25	GENE11082:106604495	-1.18426	0.0133	3.8	SP	LL, SP & SPLL
CC	GO:0005719	nuclear euchromatin	7	GENE13819:106607038	-1.05388	0.0136	0.377964	SP	No overlap
CC	GO:0008180	COP9 signalosome	7	GENE27435:106566386	1.06391	0.0269	1.13389	SP	No overlap
CC	GO:0072562	blood microparticle	9	GENE19986:106613013	1.10778	0.0307	2.33333	SP	No overlap
CC	GO:0005882	intermediate filament	8	GENE19986:106613013	1.10778	0.0309	0.707107	SP	No overlap
CC	GO:0044441	ciliary part	22	GENE12172:106605519	1.05223	0.0321	2.55841	SP	No overlap
CC	GO:0031513	nonmotile primary cilium	13	GENE16790:106609880	1.04723	0.034	0.83205	SP	No overlap
CC	GO:0044456	synapse part	53	GENE10424:106603870	1.15294	0.035	4.25818	SP	LL, SP & SPLL
CC	GO:0001750	photoreceptor outer segment	9	GENE16790:106609880	1.04723	0.0365	1	SP	No overlap
CC	GO:0016324	apical plasma membrane	27	GENE12169:106605517	3.90852	0.0388	3.65655	SP	No overlap
CC	GO:0005929	cilium	30	GENE12172:106605519	1.05223	0.0397	2.19089	SP	No overlap
CC	GO:0098590	plasma membrane region	72	GENE10970:106604332	1.04911	0.0402	4.94975	SP	No overlap
CC	GO:0072372	primary cilium	17	GENE16790:106609880	1.04723	0.0429	1.21268	SP	No overlap
CC	GO:0044463	cell projection part	81	GENE10424:106603870	1.15294	0.0479	6.11111	SP	LL, SP & SPLL
CC	GO:0005903	brush border	14	GENE12169:106605517	3.90852	0.0489	3.20713	SP	No overlap
CC	GO:0044297	cell body	53	GENE10424:106603870	1.15294	0.0492	5.35706	SP	No overlap
CC	GO:0016323	basolateral plasma membrane	8	GENE14257:106607467	1.17862	0.00082	1.41421	SPLL	LL, SP & SPLL
CC	GO:0042995	cell projection	29	GENE14257:106607467	1.17862	0.00123	2.41404	SPLL	SP & SPLL
CC	GO:0005912	adherens junction	12	GENE14257:106607467	1.17862	0.00384	1.1547	SPLL	LL & SPLL
CC	GO:0016023	cytoplasmic, membrane-bounded vesicle	18	GENE15093:106608273	1.4347	0.00492	0.471405	SPLL	LL & SPLL
CC	GO:0045202	synapse	14	GENE14257:106607467	1.17862	0.00832	1.60357	SPLL	LL & SPLL
CC	GO:0005576	extracellular region	34	GENE13022:106606374	-1.76946	0.01065	1.02899	SPLL	No overlap
CC	GO:0097458	neuron part	21	GENE14257:106607467	1.17862	0.01123	1.52753	SPLL	No overlap
CC	GO:0044421	extracellular region part	32	GENE13022:106606374	-1.76946	0.01329	1.41421	SPLL	No overlap
CC	GO:0070062	extracellular exosome	27	GENE13022:106606374	-1.76946	0.01403	0.96225	SPLL	No overlap
CC	GO:0065010	extracellular membrane-bounded organelle	27	GENE13022:106606374	-1.76946	0.01434	0.96225	SPLL	No overlap
CC	GO:1903561	extracellular vesicle	27	GENE13022:106606374	-1.76946	0.01491	0.96225	SPLL	No overlap
CC	GO:0043230	extracellular organelle	27	GENE13022:106606374	-1.76946	0.01514	0.96225	SPLL	No overlap
CC	GO:0044456	synapse part	11	GENE14257:106607467	1.17862	0.01557	1.50756	SPLL	LL, SP & SPLL
CC	GO:0044463	cell projection part	17	GENE14257:106607467	1.17862	0.01649	1.69775	SPLL	LL, SP & SPLL
CC	GO:0030139	endocytic vesicle	6	GENE15093:106608273	1.4347	0.01674	0.816497	SPLL	No overlap
CC	GO:0005938	cell cortex	7	GENE15093:106608273	1.4347	0.02304	1.88982	SPLL	No overlap
CC	GO:0098793	presynapse	6	GENE14257:106607467	1.17862	0.03289	1.63299	SPLL	LL & SPLL
CC	GO:0099568	cytoplasmic region	7	GENE15093:106608273	1.4347	0.03351	1.88982	SPLL	No overlap
CC	GO:0048471	perinuclear region of cytoplasm	11	GENE15093:106608273	1.4347	0.03722	1.50756	SPLL	No overlap
CC	GO:0005615	extracellular space	11	GENE13022:106606374	-1.76946	0.03756	0.904534	SPLL	No overlap
CC	GO:0043005	neuron projection	16	GENE14257:106607467	1.17862	0.04284	2.5	SPLL	LL & SPLL
